# Supplementary material for: Gregarious suspension feeding in a modular Ediacaran organism
Source: PubMed Central journal article supplement — Sci Adv. 2019 Jun 19;5(6):eaaw0260. doi: 10.1126/sciadv.aaw0260 (PMC6584682; doi:10.1126/sciadv.aaw0260), 2019-06-19
Supplement: aaw0260_SM.pdf [file aaw0260_SM.pdf]

## Supplementary Materials for

### **Gregarious suspension feeding in a modular Ediacaran organism**

Brandt M. Gibson\*, Imran A. Rahman, Katie M. Maloney, Rachel A. Racicot, Helke Mocke,  
Marc Laflamme, Simon A. F. Darroch

\*Corresponding author. Email: [brandt.m.gibson@vanderbilt.edu](mailto:brandt.m.gibson@vanderbilt.edu)

Published 19 June 2019, *Sci. Adv.* **5**, eaaw0260 (2019)  
DOI: 10.1126/sciadv.aaw0260

#### **The PDF file includes:**

Section S1. Reynolds number and drag coefficient calculations for characterizing flow regimes  
Fig. S1. Field photographs of *Ernietta* aggregations likely representing bioherms.  
Fig. S2. *Ernietta* model construction for CFD analyses.  
Fig. S3. Select examples of CFD simulation setup.  
Fig. S4. Frontal surface area at respective burial depth for calculations.  
Fig. S5. CFD results for single-individual model.  
Fig. S6. CFD results for multiple-individual model.  
Fig. S7. CFD results for offset multiple-individual model.  
Fig. S8. CFD drag results and SA/V values for all models.  
Table S1. Size measurements of *Ernietta* from Farm Hansburg and Farm Kuibis in Namibia, collected summer 2016.  
Table S2. Sensitivity analyses for meshing.  
Legends for movies S1 and S2

#### **Other Supplementary Material for this manuscript includes the following:**

(available at [advances.sciencemag.org/cgi/content/full/5/6/eaaw0260/DC1](https://advances.sciencemag.org/cgi/content/full/5/6/eaaw0260/DC1))

Movie S1 (.avi format). 2D FSI simulation of *Ernietta* in perpendicular orientation.  
Movie S2 (.avi format). 3D FSI simulation of *Ernietta* in parallel orientation.

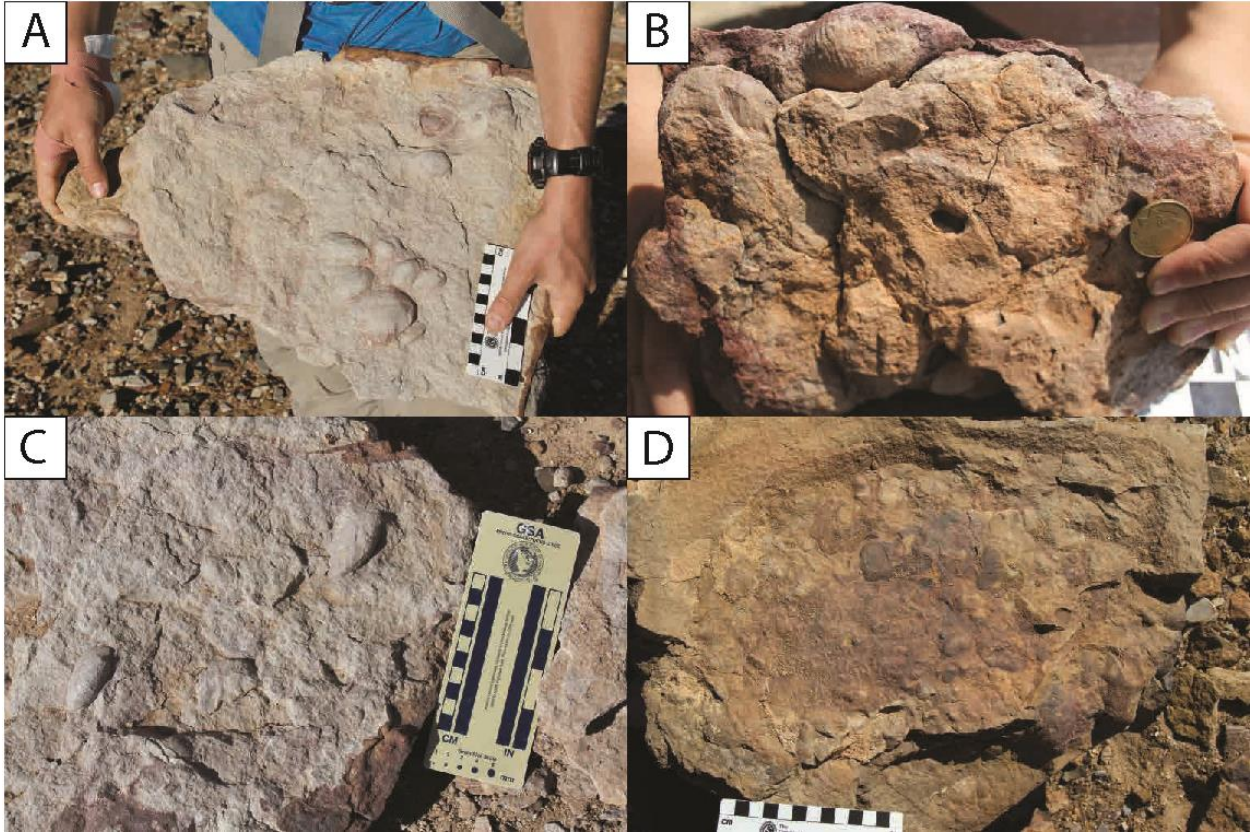

**Fig. S1. Field photographs of *Ernieetta* aggregations likely representing bioherms.** Photo credit A-D: Marc Laflamme, University of Toronto Mississauga

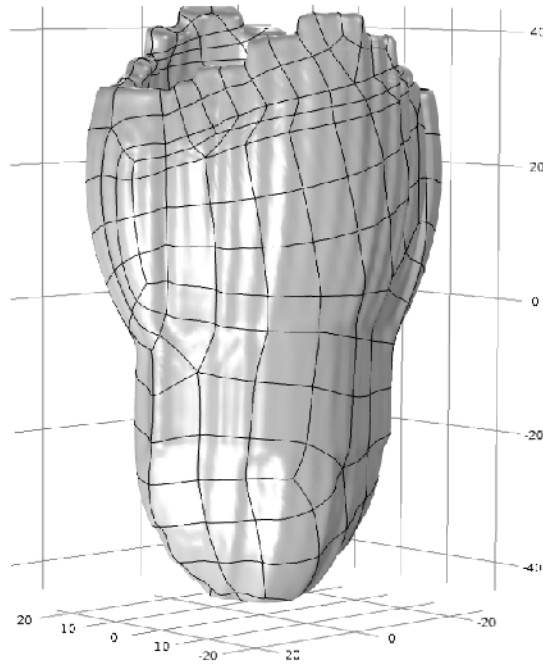

**Fig. S2. *Ernieetta* model construction for CFD analyses.** Three-dimensional digital model of the Ediacaran organism *Ernieetta* was created in COMSOL Multiphysics version 5.3a by iteratively adding and modifying cylindrical elements. The dimensions of the model (45 mm long, 45 mm wide, and 10 mm high) were derived from Ivantsov et al.'s (2016) complete specimen (NESM-F722- 4) and the average dimensions of specimens recorded from original field work in Kuibis Farm (26°37'35.00"S, 16°41'07.00"E) and Hansburg, Namibia (26°17'52.00"S, 16°54'13.00"E). Specimens from Kuibis Farm only preserved the lower-most portions of the organisms, but were consistent among the samples for overall ventral morphology. Following construction of the model in COMSOL, smoothing and removal of overlapping elements was carried out in VG Studio Max version 2.2.

**Table S1. Size measurements of *Ernietta* from Farm Hansburg and Farm Kuibis in Namibia, collected summer 2016.**

| Location | MajorSite | Site | Specimen | GPS        | GPS        | Estimated Size (cm) | L     | W    | H    | Volume (cm <sup>3</sup> ) | ellipsoid                 | elliptic cylinder     | ellipsoid             | elliptic cylinder | ellipsoid | elliptic cylinder | Tube Width |     |
|----------|-----------|------|----------|------------|------------|---------------------|-------|------|------|---------------------------|---------------------------|-----------------------|-----------------------|-------------------|-----------|-------------------|------------|-----|
|          |           |      |          |            |            |                     |       |      |      |                           | Volume (cm <sup>3</sup> ) | SA (cm <sup>2</sup> ) | SA (cm <sup>2</sup> ) | SA:V              | SA:V      | Min               |            | Max |
| HB       | HB1       | HB1A | HB1A-01  | 26 17 23.4 | 16 52 55.6 | 10                  | 11.72 | 6.85 | 2.29 | 96.26                     | 144.39                    | 145.68                | 192.91                | 1.51              | 1.34      | 0.28              | 0.33       | 15  |
| HB       | HB1       | HB1A | HB1A-02  | 26 17 23.4 | 16 52 55.6 | 6-7                 | 7.99  | 5.18 | 2.76 | 59.81                     | 89.72                     | 85.98                 | 122.11                | 1.44              | 1.36      | 0.11              | 0.15       | 17  |
| HB       | HB1       | HB1A | HB1A-03  | 26 17 23.4 | 16 52 55.6 | 5                   | 5.89  | 5.1  | 1.14 | 17.93                     | 26.90                     | 52.20                 | 66.87                 | 2.91              | 2.49      | N/A               | N/A        | N/A |
| HB       | HB1       | HB1A | HB1A-04  | 26 17 23.4 | 16 52 55.6 | 6                   | 8.17  | 5.09 | 2.08 | 45.29                     | 67.93                     | 79.35                 | 108.65                | 1.75              | 1.60      | N/A               | N/A        | N/A |
| HB       | HB1       | HB1A | HB1A-05  | 26 17 23.4 | 16 52 55.6 | 8-9                 | 9.86  | 6.4  | 1.96 | 64.76                     | 97.14                     | 113.32                | 149.18                | 1.75              | 1.54      | 0.18              | 0.22       | 20  |
| HB       | HB1       | HB1A | HB1A-06  | 26 17 23.4 | 16 52 55.6 | 10                  | 10.62 | 9.56 | 2.52 | 133.96                    | 200.94                    | 181.63                | 239.36                | 1.36              | 1.19      | 0.21              | 0.26       | 10  |
| HB       | HB1       | HB1A | HB1A-07  | 26 17 23.4 | 16 52 55.6 | 5-6                 | 8.46  | 6.4  | 2.88 | 81.65                     | 122.47                    | 108.31                | 152.27                | 1.33              | 1.24      | N/A               | N/A        | N/A |
| HB       | HB1       | HB1A | HB1A-08  | 26 17 23.4 | 16 52 55.6 | 4-5                 | 3.95  | 3.25 | 2.25 | 15.12                     | 22.69                     | 30.93                 | 45.61                 | 2.04              | 2.01      | 0.19              | 0.22       | 10  |
| HB       | HB1       | HB1A | HB1A-09  | 26 17 23.4 | 16 52 55.6 | 4-5                 | 5.2   | 3.75 | 1.69 | 17.26                     | 25.88                     | 38.81                 | 54.39                 | 2.25              | 2.10      | N/A               | N/A        | N/A |
| HB       | HB1       | HB1A | HB1A-10  | 26 17 23.4 | 16 52 55.6 | 8                   | 2.93  | 2.75 | 2.6  | 10.97                     | 16.45                     | 23.92                 | 35.85                 | 2.18              | 2.18      | N/A               | N/A        | N/A |
| HB       | HB1       | HB1A | HB1A-11  | 26 17 23.4 | 16 52 55.6 | 5                   | 5.82  | 3.73 | 2.2  | 25.01                     | 37.51                     | 46.77                 | 67.10                 | 1.87              | 1.79      | N/A               | N/A        | N/A |
| HB       | HB1       | HB1A | HB1A-12  | 26 17 23.4 | 16 52 55.6 | 5                   | 5.18  | 3.92 | 2.78 | 29.56                     | 44.34                     | 48.68                 | 71.63                 | 1.65              | 1.62      | N/A               | N/A        | N/A |
| HB       | HB1       | HB1A | HB1A-13  | 26 17 23.4 | 16 52 55.6 | 5                   | 5.84  | 3.48 | 2.27 | 24.16                     | 36.23                     | 45.18                 | 65.16                 | 1.87              | 1.80      | N/A               | N/A        | N/A |
| HB       | HB1       | HB1A | HB1A-14  | 26 17 23.4 | 16 52 55.6 | 6                   | 6.43  | 2.95 | 2.79 | 27.71                     | 41.56                     | 48.78                 | 70.90                 | 1.76              | 1.71      | N/A               | N/A        | N/A |
| HB       | HB1       | HB1A | HB1A-15  | 26 17 23.4 | 16 52 55.6 | 7                   | 7.21  | 4.4  | 1.73 | 28.74                     | 43.10                     | 59.84                 | 81.38                 | 2.08              | 1.89      | 0.18              | 0.21       | 14  |
| HB       | HB1       | HB1A | HB1A-16  | 26 17 23.4 | 16 52 55.6 | 4                   | 4.44  | 2.38 | 1.92 | 10.62                     | 15.93                     | 25.53                 | 37.17                 | 2.40              | 2.33      | 0.17              | 0.21       | 16  |
| HB       | HB1       | HB1A | HB1A-17  | 26 17 23.4 | 16 52 55.6 | 3-4                 | 4.29  | 3.08 | 1.44 | 9.96                      | 14.94                     | 26.59                 | 37.43                 | 2.67              | 2.50      | N/A               | N/A        | N/A |
| HB       | HB1       | HB1A | HB1A-18  | 26 17 23.4 | 16 52 55.6 | 3-4                 | 4.52  | 3.37 | 0.66 | 5.26                      | 7.90                      | 25.85                 | 32.11                 | 4.91              | 4.07      | N/A               | N/A        | N/A |
| HB       | HB1       | HB1A | HB1A-19  | 26 17 23.4 | 16 52 55.6 | 3-4                 | 4.17  | 2.07 | 2.04 | 9.22                      | 13.83                     | 22.94                 | 33.55                 | 2.49              | 2.43      | 0.17              | 0.2        | 5   |
| HB       | HB1       | HB1A | HB1A-20  | 26 17 23.4 | 16 52 55.6 | 5                   | 5.03  | 3.65 | 0.86 | 8.27                      | 12.40                     | 31.82                 | 40.56                 | 3.85              | 3.27      | N/A               | N/A        | N/A |
| HB       | HB1       | HB1A | HB1A-21  | 26 17 23.4 | 16 52 55.6 | 2                   | 2.71  | 2.64 | 2.09 | 7.83                      | 11.74                     | 19.28                 | 28.80                 | 2.46              | 2.45      | N/A               | N/A        | N/A |
| HB       | HB1       | HB1A | HB1A-22  | 26 17 23.4 | 16 52 55.6 | 3                   | 3.83  | 2.92 | 0.95 | 5.56                      | 8.34                      | 20.56                 | 27.64                 | 3.70              | 3.31      | N/A               | N/A        | N/A |
| HB       | HB1       | HB1A | HB1A-23  | 26 17 23.4 | 16 52 55.6 | 1                   | 3.03  | 2.97 | 0.58 | 2.73                      | 4.10                      | 15.48                 | 19.60                 | 5.66              | 4.78      | N/A               | N/A        | N/A |
| HB       | HB1       | HB1A | HB1A-24  | 26 17 23.4 | 16 52 55.6 | 2-3                 | 2.79  | 1.92 | 0.93 | 2.61                      | 3.91                      | 10.85                 | 15.30                 | 4.16              | 3.91      | 0.2               | 0.19       | 9   |
| HB       | HB1       | HB1A | HB1A-25  | 26 17 23.4 | 16 52 55.6 | 3-4                 | 4.21  | 3.62 | 1.34 | 10.69                     | 16.04                     | 29.26                 | 40.42                 | 2.74              | 2.52      | N/A               | N/A        | N/A |
| HB       | HB1       | HB1A | HB1A-26  | 26 17 23.4 | 16 52 55.6 | 3                   | 3.54  | 3.51 | 1.93 | 12.56                     | 18.83                     | 28.00                 | 40.89                 | 2.23              | 2.17      | 0.17              | 0.15       | 5   |

|    |     |      |              |            |            |     |      |      |      |       |       |       |        |       |       |      |      |     |
|----|-----|------|--------------|------------|------------|-----|------|------|------|-------|-------|-------|--------|-------|-------|------|------|-----|
| HB | HB1 | HB1A | HB1A-27      | 26 17 23.4 | 16 52 55.6 | 5-6 | 6.92 | 6.7  | 2.48 | 60.20 | 90.31 | 90.36 | 125.89 | 1.50  | 1.39  | 0.17 | 0.23 | 9   |
| HB | HB1 | HB1A | HB1A-28      | 26 17 23.4 | 16 52 55.6 | 5-6 | 6.25 | 3.29 | 1.35 | 14.53 | 21.80 | 38.79 | 52.53  | 2.67  | 2.41  | N/A  | N/A  | N/A |
| HB | HB1 | HB1A | HB1A-29      | 26 17 23.4 | 16 52 55.6 | 4-5 | 5.5  | 4.89 | 0.9  | 12.67 | 19.01 | 45.69 | 56.94  | 3.61  | 2.99  | 0.16 | 0.2  | 10  |
| HB | HB1 | HB1A | HB1A-30      | 26 17 23.4 | 16 52 55.6 | 6-7 | 7.03 | 6.1  | 2.73 | 61.30 | 91.95 | 87.23 | 123.67 | 1.42  | 1.34  | 0.19 | 0.23 | 9   |
| HB | HB1 | HB1A | HB1A-31      | 26 17 23.4 | 16 52 55.6 | 3-4 | 4.64 | 3.42 | 1.91 | 15.87 | 23.80 | 34.12 | 49.11  | 2.15  | 2.06  | N/A  | N/A  | N/A |
| HB | HB1 | HB1A | HB1A-32      | 26 17 23.4 | 16 52 55.6 | 4-5 | 5.19 | 3.98 | 3.15 | 34.07 | 51.10 | 52.51 | 77.82  | 1.54  | 1.52  | N/A  | N/A  | N/A |
| HB | HB1 | HB1A | HB1A-33      | 26 17 23.4 | 16 52 55.6 | 4-5 | 5.45 | 3.04 | 2.5  | 21.69 | 32.53 | 40.63 | 59.37  | 1.87  | 1.82  | 0.2  | 0.23 | 16  |
| HB | HB1 | HB1B | HB1B-01      | 26 17 23.2 | 16 52 58.9 | 6   | 7.18 | 4.37 | 3.89 | 63.91 | 95.86 | 81.32 | 119.86 | 1.27  | 1.25  | N/A  | N/A  | N/A |
| HB | HB1 | HB1B | HB1B-02      | 26 17 23.2 | 16 52 58.9 | 3   | 4.29 | 2.46 | 1.96 | 10.83 | 16.25 | 25.58 | 37.36  | 2.36  | 2.30  | N/A  | N/A  | N/A |
| HB | HB1 | HB1B | HB1B-03      | 26 17 23.2 | 16 52 58.9 | 3   | 5.65 | 2.3  | 2.14 | 14.56 | 21.84 | 32.69 | 47.14  | 2.25  | 2.16  | 0.18 | 0.21 | 11  |
| HB | HB1 | HB1B | HB1B-04      | 26 17 23.2 | 16 52 58.9 | 2-3 | 3.68 | 2.55 | 2.35 | 11.55 | 17.32 | 25.41 | 37.74  | 2.20  | 2.18  | 0.17 | 0.22 | 15  |
| HB | HB1 | HB1B | HB1B-05      | 26 17 23.2 | 16 52 58.9 | 3-4 | 4.43 | 2.22 | 0.87 | 4.48  | 6.72  | 18.30 | 24.54  | 4.08  | 3.65  | 0.13 | 0.15 | 13  |
| HB | HB1 | HB1B | HB1B-06      | 26 17 23.2 | 16 52 58.9 | 4-5 | 5.47 | 2.63 | 1.98 | 14.91 | 22.37 | 33.20 | 47.79  | 2.23  | 2.14  | 0.21 | 0.24 | 15  |
| HB | HB1 | HB1B | HB1B-07      | 26 17 23.2 | 16 52 58.9 | 3-4 | 4.07 | 2.03 | 2.09 | 9.04  | 13.56 | 22.53 | 33.00  | 2.49  | 2.43  | 0.19 | 0.22 | 14  |
| HB | HB1 | HB1B | HB1B-08      | 26 17 23.2 | 16 52 58.9 | 3   | 3.75 | 2.16 | 1.44 | 6.11  | 9.16  | 18.10 | 26.09  | 2.96  | 2.85  | N/A  | N/A  | N/A |
| HB | HB1 | HB1B | HB1B-09      | 26 17 23.2 | 16 52 58.9 | 2-3 | 3.37 | 2.77 | 1.52 | 7.43  | 11.14 | 20.28 | 29.32  | 2.73  | 2.63  | N/A  | N/A  | N/A |
| HB | HB1 | HB1B | HB1B-10      | 26 17 23.2 | 16 52 58.9 | 4-5 | 4.73 | 2.18 | 1.77 | 9.56  | 14.33 | 24.54 | 35.41  | 2.57  | 2.47  | 0.17 | 0.22 | 14  |
| HB | HB1 | HB1B | HB1B-11      | 26 17 23.2 | 16 52 58.9 | 3-4 | 3.72 | 2.84 | 2.04 | 11.28 | 16.93 | 25.53 | 37.62  | 2.26  | 2.22  | 0.16 | 0.21 | 14  |
| HB | HB1 | HB1B | HB1B-12      | 26 17 23.2 | 16 52 58.9 | 3-4 | 4.11 | 2.44 | 1.72 | 9.03  | 13.55 | 23.05 | 33.45  | 2.55  | 2.47  | N/A  | N/A  | N/A |
| HB | HB1 | HB1B | HB1B-13      | 26 17 23.2 | 16 52 58.9 | 3-4 | 3.73 | 1.57 | 2.31 | 7.08  | 10.62 | 19.60 | 28.43  | 2.77  | 2.68  | 0.16 | 0.23 | 9   |
| HB | HB1 | HB1B | HB1B-14      | 26 17 23.2 | 16 52 58.9 | 2-3 | 2.94 | 1.6  | 1.41 | 3.47  | 5.21  | 11.91 | 17.44  | 3.43  | 3.35  | N/A  | N/A  | N/A |
| HB | HB1 | HB1B | HB1B-15      | 26 17 23.2 | 16 52 58.9 | 3-4 | 4.05 | 2.47 | 1.71 | 8.96  | 13.44 | 22.89 | 33.23  | 2.56  | 2.47  | 0.11 | 0.2  | 17  |
| HB | HB1 | HB1B | HB1B-16      | 26 17 23.2 | 16 52 58.9 | 3-4 | 4.4  | 2.34 | 1.36 | 7.33  | 11.00 | 21.60 | 30.57  | 2.95  | 2.78  | N/A  | N/A  | N/A |
| HB | HB1 | HB1B | HB1B-17      | 26 17 23.2 | 16 52 58.9 | 4-5 | 4.14 | 3.31 | 0.72 | 5.17  | 7.75  | 23.62 | 29.95  | 4.57  | 3.87  | 0.17 | 0.18 | 11  |
| HB | HB1 | HB1B | HB1B-18      | 26 17 23.2 | 16 52 58.9 | 1-2 | 2.74 | 1.97 | 1.77 | 5.00  | 7.50  | 14.52 | 21.57  | 2.90  | 2.88  | 0.18 | 0.22 | 8   |
| HB | HB1 | HB1B | HB1B-19      | 26 17 23.2 | 16 52 58.9 | 2-3 | 3.47 | 2.42 | 1.03 | 4.53  | 6.79  | 16.37 | 22.72  | 3.61  | 3.34  | 0.17 | 0.22 | 7   |
| HB | HB1 | HB1B | HB1B-20      | 26 17 23.2 | 16 52 58.9 | 5-6 | 4.96 | 3.56 | 2.95 | 27.27 | 40.91 | 45.38 | 67.22  | 1.66  | 1.64  | 0.19 | 0.22 | 12  |
| HB | HB1 | HB1B | HB1B-21      | 26 17 23.2 | 16 52 58.9 | 3-4 | 3.62 | 2.97 | 0.69 | 3.88  | 5.83  | 18.72 | 24.03  | 4.82  | 4.12  | 0.13 | 0.18 | 11  |
| HB | HB1 | HB1B | HB1B-21 Rock | 26 17 23.2 | 16 52 58.9 | 1-2 | 0.9  | 0.6  | 0.15 | 0.04  | 0.06  | 0.94  | 1.20   | 22.16 | 18.89 | N/A  | N/A  | N/A |
| HB | HB1 | HB1B | HB1B-22      | 26 17 23.2 | 16 52 58.9 | 5   | 3.46 | 2.79 | 0.59 | 2.98  | 4.47  | 16.59 | 20.96  | 5.56  | 4.68  | 0.25 | 0.3  | 9   |
| HB | HB1 | HB1B | HB1B-23      | 26 17 23.2 | 16 52 58.9 | 3-4 | 3.88 | 2.69 | 1.68 | 9.18  | 13.77 | 23.27 | 33.73  | 2.53  | 2.45  | 0.22 | 0.25 | 13  |
| HB | HB1 | HB1B | HB1B-24      | 26 17 23.2 | 16 52 58.9 | 1-2 | 1.82 | 1.61 | 0.66 | 1.01  | 1.52  | 5.81  | 8.16   | 5.74  | 5.37  | N/A  | N/A  | N/A |
| HB | HB1 | HB1B | HB1B-25      | 26 17 23.2 | 16 52 58.9 | 3-4 | 5    | 2.87 | 1.89 | 14.20 | 21.30 | 31.88 | 45.91  | 2.25  | 2.16  | 0.18 | 0.23 | 9   |

|    |     |      |          |            |            |     |      |      |      |       |       |       |       |      |      |      |      |     |
|----|-----|------|----------|------------|------------|-----|------|------|------|-------|-------|-------|-------|------|------|------|------|-----|
| HB | HB1 | HB1B | HB1B-26  | 26 17 23.2 | 16 52 58.9 | 3-4 | 4.13 | 2.63 | 1.8  | 10.24 | 15.36 | 24.88 | 36.18 | 2.43 | 2.36 | 0.14 | 0.19 | 8   |
| HB | HB1 | HB1B | HB1B-27  | 26 17 23.2 | 16 52 58.9 | 3-4 | 4.01 | 2.66 | 1.78 | 9.94  | 14.91 | 24.34 | 35.40 | 2.45 | 2.37 | N/A  | N/A  | N/A |
| HB | HB1 | HB1B | HB1B-28  | 26 17 23.2 | 16 52 58.9 | 3-4 | 3.36 | 3.09 | 1.73 | 9.40  | 14.11 | 23.21 | 33.84 | 2.47 | 2.40 | N/A  | N/A  | N/A |
| HB | HB1 | HB1B | HB1B-29  | 26 17 23.2 | 16 52 58.9 | 2-3 | 2.54 | 1.68 | 1.56 | 3.49  | 5.23  | 11.50 | 17.04 | 3.30 | 3.26 | N/A  | N/A  | N/A |
| HB | HB1 | HB1B | HB1B-30  | 26 17 23.2 | 16 52 58.9 | 2-3 | 1.86 | 1.09 | 0.94 | 1.00  | 1.50  | 5.13  | 7.54  | 5.14 | 5.04 | 0.19 | 0.25 | 7   |
| HB | HB1 | HB1B | HB1B-31  | 26 17 23.2 | 16 52 58.9 | 4-5 | 4.45 | 1.76 | 1.12 | 4.59  | 6.89  | 16.58 | 23.23 | 3.61 | 3.37 | 0.12 | 0.19 | 11  |
| HB | HB1 | HB1B | HB1B-32  | 26 17 23.2 | 16 52 58.9 | 2-3 | 2.14 | 1.99 | 1.71 | 3.81  | 5.72  | 11.89 | 17.78 | 3.12 | 3.11 | 0.16 | 0.18 | 8   |
| HB | HB1 | HB1B | HB1B-33  | 26 17 23.2 | 16 52 58.9 | 1-2 | 1.37 | 1.29 | 1.7  | 1.57  | 2.36  | 6.61  | 9.88  | 4.20 | 4.19 | 0.15 | 0.18 | 6   |
| HB | HB1 | HB1B | HB1B-34  | 26 17 23.2 | 16 52 58.9 | 1-2 | 2.33 | 1.18 | 0.4  | 0.58  | 0.86  | 4.96  | 6.52  | 8.62 | 7.55 | 0.19 | 0.24 | 8   |
| HB | HB1 | HB1B | HB1B-35  | 26 17 23.2 | 16 52 58.9 | 3-4 | 3.2  | 1.95 | 0.83 | 2.71  | 4.07  | 12.01 | 16.52 | 4.43 | 4.06 | N/A  | N/A  | N/A |
| HB | HB1 | HB1B | HB1B-36  | 26 17 23.2 | 16 52 58.9 | 3-4 | 3.13 | 2.63 | 1.05 | 4.53  | 6.79  | 16.09 | 22.43 | 3.56 | 3.30 | 0.14 | 0.17 | 9   |
| HB | HB1 | HB1B | HB1B-37  | 26 17 23.2 | 16 52 58.9 | 5-6 | 4.09 | 2.28 | 0.44 | 2.15  | 3.22  | 15.65 | 19.05 | 7.28 | 5.91 | 0.19 | 0.23 | 8   |
| HB | HB1 | HB1B | HB1B-38  | 26 17 23.2 | 16 52 58.9 | 4-5 | 4.62 | 2.58 | 0.78 | 4.87  | 7.30  | 21.18 | 27.54 | 4.35 | 3.77 | 0.2  | 0.25 | 9   |
| HB | HB1 | HB1B | HB1B-39  | 26 17 23.2 | 16 52 58.9 | 3-4 | 2.89 | 1.66 | 1.49 | 3.74  | 5.61  | 12.37 | 18.18 | 3.31 | 3.24 | 0.14 | 0.21 | 6   |
| HB | HB1 | HB1B | HB1B-40  | 26 17 23.2 | 16 52 58.9 | 3-4 | 3.44 | 2.28 | 1.29 | 5.30  | 7.95  | 16.70 | 23.91 | 3.15 | 3.01 | N/A  | N/A  | N/A |
| HB | HB1 | HB1B | HB1B-41  | 26 17 23.2 | 16 52 58.9 | 2-3 | 2.14 | 2.13 | 1.33 | 3.17  | 4.76  | 10.90 | 16.08 | 3.43 | 3.38 | 0.13 | 0.18 | 11  |
| HB | HB1 | HB1B | HB1B-42  | 26 17 23.2 | 16 52 58.9 | 3-4 | 3.54 | 3.18 | 2.42 | 14.26 | 21.40 | 29.05 | 43.23 | 2.04 | 2.02 | 0.16 | 0.2  | 9   |
| HB | HB1 | HB1B | HB1B-43  | 26 17 23.2 | 16 52 58.9 | 3-4 | 2.54 | 1.57 | 2.62 | 5.47  | 8.21  | 15.73 | 23.18 | 2.88 | 2.82 | 0.23 | 0.27 | 7   |
| HB | HB1 | HB1B | HB1B-44  | 26 17 23.2 | 16 52 58.9 | 3-4 | 4.06 | 2.68 | 1    | 5.70  | 8.55  | 20.39 | 27.68 | 3.58 | 3.24 | N/A  | N/A  | N/A |
| HB | HB1 | HB1B | HB1B-45  | 26 17 23.2 | 16 52 58.9 | 3-4 | 3.4  | 3.12 | 1.33 | 7.39  | 11.08 | 21.41 | 30.28 | 2.90 | 2.73 | 0.23 | 0.27 | 9   |
| HB | HB1 | HB1B | HB1B-46  | 26 17 23.2 | 16 52 58.9 | 1-2 | 0.8  | 0.67 | 1.21 | 0.34  | 0.51  | 2.46  | 3.64  | 7.25 | 7.14 | N/A  | N/A  | N/A |
| HB | HB1 | HB1B | HB1B-47A | 26 17 23.2 | 16 52 58.9 | 3-4 | 2.82 | 1.9  | 1.42 | 3.98  | 5.98  | 12.91 | 18.94 | 3.24 | 3.17 | 0.15 | 0.18 | 12  |
| HB | HB1 | HB1B | HB1B-47B | 26 17 23.2 | 16 52 58.9 | 1-2 | 1.83 | 0.66 | 0.41 | 0.26  | 0.39  | 2.52  | 3.50  | 9.72 | 9.00 | 0.26 | 0.32 | 3   |
| HB | HB1 | HB1B | HB1B-48  | 26 17 23.2 | 16 52 58.9 | 2-3 | 2.5  | 1.1  | 1.35 | 1.94  | 2.92  | 8.20  | 11.95 | 4.22 | 4.10 | N/A  | N/A  | N/A |
| HB | HB1 | HB1B | HB1B-49  | 26 17 23.2 | 16 52 58.9 | 3-4 | 2.99 | 2.36 | 2.14 | 7.91  | 11.86 | 19.49 | 29.07 | 2.46 | 2.45 | N/A  | N/A  | N/A |
| HB | HB1 | HB1B | HB1B-50  | 26 17 23.2 | 16 52 58.9 | 3-4 | 2.62 | 1.84 | 1.9  | 4.80  | 7.19  | 14.02 | 20.88 | 2.92 | 2.90 | N/A  | N/A  | N/A |
| HB | HB1 | HB1B | HB1B-51  | 26 17 23.2 | 16 52 58.9 | 2-3 | 2.95 | 1.46 | 2.02 | 4.56  | 6.83  | 14.16 | 20.76 | 3.11 | 3.04 | N/A  | N/A  | N/A |
| HB | HB1 | HB1B | HB1B-52  | 26 17 23.2 | 16 52 58.9 | 3-4 | 3.84 | 2.37 | 0.93 | 4.43  | 6.65  | 17.17 | 23.37 | 3.88 | 3.52 | N/A  | N/A  | N/A |
| HB | HB1 | HB1C | HB1C-01  | 26 17 23.4 | 16 52 59.9 | 1-2 | 2.31 | 1.58 | 1.32 | 2.52  | 3.78  | 9.33  | 13.80 | 3.70 | 3.65 | 0.07 | 0.09 | 14  |
| HB | HB1 | HB1C | HB1C-02  | 26 17 23.4 | 16 52 59.9 | 1-2 | 2.64 | 1.51 | 0.96 | 2.00  | 3.01  | 8.73  | 12.52 | 4.35 | 4.17 | N/A  | N/A  | N/A |
| HB | HB1 | HB1C | HB1C-03  | 26 17 23.4 | 16 52 59.9 | 4-5 | 4.57 | 2.43 | 1.58 | 9.19  | 13.78 | 24.33 | 34.82 | 2.65 | 2.53 | N/A  | N/A  | N/A |
| HB | HB1 | HB1C | HB1C-04  | 26 17 23.4 | 16 52 59.9 | 2-3 | 3.26 | 2.11 | 1.1  | 3.96  | 5.94  | 14.18 | 20.08 | 3.58 | 3.38 | N/A  | N/A  | N/A |
| HB | HB1 | HB1C | HB1C-05  | 26 17 23.4 | 16 52 59.9 | 1-2 | 2.8  | 1.55 | 0.76 | 1.73  | 2.59  | 8.63  | 12.01 | 5.00 | 4.64 | N/A  | N/A  | N/A |
| HB | HB1 | HB1C | HB1C-06  | 26 17 23.4 | 16 52 59.9 | 1-2 | 2.15 | 1.31 | 0.75 | 1.11  | 1.66  | 5.96  | 8.50  | 5.39 | 5.12 | 0.08 | 0.13 | 11  |
| HB | HB1 | HB1C | HB1C-07  | 26 17 23.4 | 16 52 59.9 | 1-2 | 2.08 | 1.32 | 1.18 | 1.70  | 2.54  | 7.19  | 10.61 | 4.24 | 4.17 | N/A  | N/A  | N/A |
| HB | HB1 | HB1C | HB1C-08  | 26 17 23.4 | 16 52 59.9 | 1-2 | 1.99 | 1.42 | 0.75 | 1.11  | 1.66  | 5.92  | 8.46  | 5.34 | 5.08 | 0.06 | 0.09 | 9   |

|    |     |      |           |            |            |           |      |      |      |       |       |       |       |      |      |      |      |     |
|----|-----|------|-----------|------------|------------|-----------|------|------|------|-------|-------|-------|-------|------|------|------|------|-----|
| HB | HB1 | HB1C | HB1C-09   | 26 17 23.4 | 16 52 59.9 | 2-3       | 2.51 | 1.48 | 1.82 | 3.54  | 5.31  | 11.65 | 17.24 | 3.29 | 3.25 | 0.06 | 0.09 | 13  |
| HB | HB1 | HB1C | HB1C-10   | 26 17 23.4 | 16 52 59.9 | 1-2       | 1.84 | 1.53 | 1.93 | 2.84  | 4.27  | 9.79  | 14.64 | 3.44 | 3.43 | 0.06 | 0.1  | 11  |
| HB | HB1 | HB1C | HB1C-11   | 26 17 23.4 | 16 52 59.9 | 1-2       | 2.23 | 1.17 | 1.09 | 1.49  | 2.23  | 6.77  | 9.92  | 4.55 | 4.44 | N/A  | N/A  | N/A |
| HB | HB1 | HB1C | HB1C-12   | 26 17 23.4 | 16 52 59.9 | 1-2       | 2.26 | 1.47 | 1.15 | 2.00  | 3.00  | 8.14  | 11.96 | 4.07 | 3.98 | N/A  | N/A  | N/A |
| HB | HB1 | HB1C | HB1C-13   | 26 17 23.4 | 16 52 59.9 | 4-5 (1-2) | 1.64 | 0.92 | 0.72 | 0.57  | 0.85  | 3.61  | 5.27  | 6.35 | 6.17 | N/A  | N/A  | N/A |
| HB | HB1 | HB1C | HB1C-14   | 26 17 23.4 | 16 52 59.9 | 1-2       | 2.06 | 1.33 | 1.26 | 1.81  | 2.71  | 7.43  | 11.01 | 4.11 | 4.06 | N/A  | N/A  | N/A |
| HB | HB1 | HB1C | HB1C-15   | 26 17 23.4 | 16 52 59.9 | 1         | 1.82 | 1.51 | 1.11 | 1.60  | 2.40  | 6.84  | 10.12 | 4.28 | 4.23 | N/A  | N/A  | N/A |
| HB | HB1 | HB1C | HB1C-16   | 26 17 23.4 | 16 52 59.9 | 2-3       | 2.38 | 1.88 | 1.72 | 4.03  | 6.04  | 12.42 | 18.54 | 3.08 | 3.07 | N/A  | N/A  | N/A |
| HB | HB1 | HB1C | HB1C-17   | 26 17 23.4 | 16 52 59.9 | 1         | 2.11 | 1    | 1.03 | 1.14  | 1.71  | 5.71  | 8.35  | 5.02 | 4.89 | N/A  | N/A  | N/A |
| HB | HB1 | HB1C | HB1C-18   | 26 17 23.4 | 16 52 59.9 | 2-3       | 3.43 | 1.59 | 0.62 | 1.77  | 2.66  | 10.09 | 13.46 | 5.70 | 5.07 | 0.08 | 0.12 | 13  |
| HB | HB1 | HB1C | HB1C-19   | 26 17 23.4 | 16 52 59.9 | 1-2       | 1.63 | 1.44 | 0.86 | 1.06  | 1.59  | 5.35  | 7.83  | 5.07 | 4.94 | 0.07 | 0.11 | 11  |
| HB | HB1 | HB1C | HB1C-20   | 26 17 23.4 | 16 52 59.9 | 2-3       | 2.17 | 1.46 | 1.26 | 2.09  | 3.14  | 8.22  | 12.16 | 3.93 | 3.88 | N/A  | N/A  | N/A |
| HB | HB1 | HB1C | HB1C-21   | 26 17 23.4 | 16 52 59.9 | 2-3       | 2.34 | 1.6  | 1.04 | 2.04  | 3.06  | 8.47  | 12.32 | 4.16 | 4.03 | N/A  | N/A  | N/A |
| HB | HB1 | HB1C | HB1C-22   | 26 17 23.4 | 16 52 59.9 | 3-4       | 4.24 | 2.47 | 2.58 | 14.15 | 21.22 | 29.53 | 43.64 | 2.09 | 2.06 | 0.14 | 0.17 | 14  |
| HB | HB1 | HB1C | HB1C-23   | 26 17 23.4 | 16 52 59.9 | 1-2       | 2.37 | 1.77 | 1.09 | 2.39  | 3.59  | 9.41  | 13.68 | 3.93 | 3.81 | N/A  | N/A  | N/A |
| HB | HB1 | HB1C | HB1C-24   | 26 17 23.4 | 16 52 59.9 | 1-2       | 2.07 | 1.51 | 1.43 | 2.34  | 3.51  | 8.70  | 12.95 | 3.72 | 3.69 | N/A  | N/A  | N/A |
| HB | HB1 | HB1C | HB1C-25 A | 26 17 23.4 | 16 52 59.9 | 2-3       | 2.68 | 1.48 | 0.72 | 1.50  | 2.24  | 7.87  | 10.94 | 5.26 | 4.88 | 0.09 | 0.13 | 8   |
| HB | HB1 | HB1C | HB1C-25B  | 27 17 23.4 | 17 52 59.9 | 2-3       | 2.38 | 1.17 | 0.72 | 1.05  | 1.57  | 5.92  | 8.39  | 5.64 | 5.33 | 0.1  | 0.14 | 13  |
| HB | HB1 | HB1C | HB1C-26   | 26 17 23.4 | 16 52 59.9 | 1-2       | 1.51 | 1.13 | 0.83 | 0.74  | 1.11  | 4.15  | 6.12  | 5.60 | 5.50 | N/A  | N/A  | N/A |
| HB | HB1 | HB1C | HB1C-27   | 26 17 23.4 | 16 52 59.9 | 1-2       | 1.82 | 1.01 | 0.75 | 0.72  | 1.08  | 4.29  | 6.22  | 5.94 | 5.75 | N/A  | N/A  | N/A |
| HB | HB1 | HB1C | HB1C-28   | 26 17 23.4 | 16 52 59.9 | 1-2       | 1.69 | 0.93 | 0.99 | 0.81  | 1.22  | 4.44  | 6.54  | 5.45 | 5.35 | 0.9  | 0.13 | 10  |
| HB | HB1 | HB1C | HB1C-29   | 26 17 23.4 | 16 52 59.9 | 2-3       | 3.52 | 2.66 | 0.86 | 4.22  | 6.32  | 17.18 | 23.06 | 4.08 | 3.65 | N/A  | N/A  | N/A |
| HB | HB1 | HB1C | HB1C-30   | 26 17 23.4 | 16 52 59.9 | 2-3       | 2.14 | 1.33 | 1.8  | 2.68  | 4.02  | 9.64  | 14.28 | 3.59 | 3.55 | N/A  | N/A  | N/A |
| HB | HB1 | HB1C | HB1C-31   | 26 17 23.4 | 16 52 59.9 | 2-3       | 1.9  | 1.31 | 1.1  | 1.43  | 2.15  | 6.39  | 9.46  | 4.46 | 4.40 | 0.12 | 0.17 | 9   |
| HB | HB1 | HB1C | HB1C-32   | 26 17 23.4 | 16 52 59.9 | 2-3       | 2.41 | 1.56 | 1.07 | 2.11  | 3.16  | 8.64  | 12.58 | 4.10 | 3.98 | N/A  | N/A  | N/A |
| HB | HB1 | HB1C | HB1C-33   | 26 17 23.4 | 16 52 59.9 | 1-2       | 1.58 | 1.33 | 1.71 | 1.88  | 2.82  | 7.44  | 11.12 | 3.95 | 3.94 | 0.09 | 0.14 | 11  |
| HB | HB1 | HB1C | HB1C-34   | 26 17 23.4 | 16 52 59.9 | 1-2       | 2.15 | 1.58 | 0.98 | 1.74  | 2.61  | 7.62  | 11.08 | 4.37 | 4.24 | 0.1  | 0.12 | 13  |
| HB | HB1 | HB1C | HB1C-35   | 26 17 23.4 | 16 52 59.9 | 2-3       | 2.3  | 1.75 | 1.11 | 2.34  | 3.51  | 9.17  | 13.38 | 3.92 | 3.81 | 0.9  | 0.13 | 7   |
| HB | HB1 | HB1C | HB1C-36   | 26 17 23.4 | 16 52 59.9 | 1-2       | 1.98 | 1.51 | 2.06 | 3.22  | 4.84  | 10.72 | 15.99 | 3.33 | 3.31 | 0.13 | 0.18 | 8   |
| HB | HB1 | HB1C | HB1C-37   | 26 17 23.4 | 16 52 59.9 | 2-3       | 2.21 | 1.62 | 0.79 | 1.48  | 2.22  | 7.32  | 10.38 | 4.94 | 4.67 | N/A  | N/A  | N/A |
| HB | HB1 | HB1C | HB1C-38   | 26 17 23.4 | 16 52 59.9 | 2-3       | 2.1  | 1.94 | 1.67 | 3.56  | 5.34  | 11.36 | 17.00 | 3.19 | 3.18 | 0.12 | 0.16 | 8   |
| HB | HB1 | HB1C | HB1C-39   | 26 17 23.4 | 16 52 59.9 | 1-2       | 1.75 | 1.02 | 1.1  | 1.03  | 1.54  | 5.13  | 7.59  | 4.99 | 4.92 | N/A  | N/A  | N/A |
| HB | HB1 | HB1C | HB1C-40   | 26 17 23.4 | 16 52 59.9 | 1-2       | 2.37 | 1.92 | 0.43 | 1.02  | 1.54  | 7.88  | 10.05 | 7.69 | 6.54 | N/A  | N/A  | N/A |
| HB | HB1 | HB1D | HB1D-01   | 26 17 23.3 | 16 53 01.2 | 5-6       | 5.4  | 3.27 | 1.01 | 9.34  | 14.01 | 31.63 | 41.49 | 3.39 | 2.96 | N/A  | N/A  | N/A |
| HB | HB1 | HB1D | HB1D-02   | 26 17 23.3 | 16 53 01.2 | 6-7       | 5.78 | 4.27 | 0.94 | 12.15 | 18.22 | 42.43 | 53.61 | 3.49 | 2.94 | N/A  | N/A  | N/A |
| HB | HB1 | HB1D | HB1D-03   | 26 17 23.3 | 16 53 01.2 | 7-8       | 7.67 | 5.52 | 1.58 | 35.03 | 52.54 | 75.60 | 99.24 | 2.16 | 1.89 | N/A  | N/A  | N/A |

|    |     |      |                 |            |            |     |       |      |      |       |        |        |        |      |      |              |      |     |
|----|-----|------|-----------------|------------|------------|-----|-------|------|------|-------|--------|--------|--------|------|------|--------------|------|-----|
| HB | HB1 | HB1D | HB1D-04         | 26 17 23.3 | 16 53 01.2 | 5-6 | 5.26  | 4.4  | 2.12 | 25.69 | 38.54  | 48.02  | 68.52  | 1.87 | 1.78 | Split into 2 |      |     |
| HB | HB1 | HB1D | HB1D-04A        | 27 17 23.3 | 17 53 01.2 | 4-5 | 5.35  | 2.16 | 2.03 | 12.28 | 18.42  | 29.20  | 42.10  | 2.38 | 2.28 | 0.16         | 0.21 | 7   |
| HB | HB1 | HB1D | HB1D-04B        | 28 17 23.3 | 18 53 01.2 | 4-5 | 4.77  | 2.15 | 1.78 | 9.56  | 14.34  | 24.58  | 35.46  | 2.57 | 2.47 | 0.16         | 0.2  | 18  |
| HB | HB1 | HB1D | HB1D-05         | 26 17 23.3 | 16 53 01.2 | 10  | 7.17  | 5.67 | 2.67 | 56.83 | 85.25  | 83.01  | 117.71 | 1.46 | 1.38 | 0.2          | 0.25 | 8   |
| HB | HB1 | HB1D | Sample and Rock | 27 17 23.3 | 17 53 01.2 | 7-8 | 7.69  | 7.66 | 2.67 | 82.35 | 123.53 | 113.35 | 156.91 | 1.38 | 1.27 | N/A          | N/A  | N/A |
| HB | HB1 | HB1D | HB1D-06         | 26 17 23.3 | 16 53 01.2 | 10  | 3.8   | 3.29 | 2.03 | 13.29 | 19.93  | 28.82  | 42.25  | 2.17 | 2.12 | N/A          | N/A  | N/A |
| HB | HB1 | HB1D | Sample and Rock | 27 17 23.3 | 17 53 01.2 | 8-9 | 8.69  | 4.6  | 0.81 | 16.95 | 25.43  | 66.49  | 79.70  | 3.92 | 3.13 | N/A          | N/A  | N/A |
| HB | HB1 | HB1E | HB1E-01         | 26 17 23.4 | 16 53 04.1 | 2-3 | 3.39  | 2.6  | 3.34 | 15.41 | 23.12  | 30.32  | 45.27  | 1.97 | 1.96 | 0.09         | 0.13 | 13  |
| HB | HB5 | HB5  | HB5-01          | 26 17 3.94 | 16 54 21.1 | 4-5 | 3.74  | 2.33 | 1.11 | 5.06  | 7.60   | 17.37  | 24.27  | 3.43 | 3.19 | 0.1          | 0.16 | 17  |
| HB | HB5 | HB5  | HB5-02          | 26 17 3.94 | 16 54 21.1 | 3-4 | 2.54  | 2.46 | 0.53 | 1.73  | 2.60   | 10.88  | 13.98  | 6.28 | 5.37 | 0.18         | 0.25 | 14  |
| KB | KB  | KB   | KB-01           | 26 38 09.4 | 16 41 21.6 | 5-6 | 4.45  | 2.54 | 0.98 | 5.80  | 8.70   | 21.12  | 28.51  | 3.64 | 3.28 | N/A          | N/A  | N/A |
| KB | KB  | KB   | Sample and Rock | 27 38 09.4 | 17 41 21.6 | 7-8 | 10.05 | 9.08 | 1.65 | 78.84 | 118.26 | 154.94 | 192.92 | 1.97 | 1.63 | N/A          | N/A  | N/A |
| KB | KB  | KB   | KB-02           | 26 38 09.4 | 16 41 21.6 | 4-5 | 7.82  | 4.93 | 1    | 20.19 | 30.28  | 65.25  | 80.59  | 3.23 | 2.66 | N/A          | N/A  | N/A |
| KB | KB  | KB   | KB-03           | 26 38 09.4 | 16 41 21.6 | 2-3 | 2.36  | 1.94 | 0.81 | 1.94  | 2.91   | 9.04   | 12.66  | 4.66 | 4.35 | 0.08         | 0.12 | 8   |
| KB | KB  | KB   | Sample and Rock | 27 38 09.4 | 17 41 21.6 | 3-4 | 3.55  | 1.56 | 0.7  | 2.03  | 3.04   | 10.57  | 14.32  | 5.21 | 4.70 | N/A          | N/A  | N/A |
| KB | KB  | KB   | KB-04           | 26 38 09.4 | 16 41 21.6 | 6-7 | 2.58  | 2.31 | 1.12 | 3.50  | 5.24   | 12.53  | 17.96  | 3.58 | 3.43 | N/A          | N/A  | N/A |
| KB | KB  | KB   | KB-05           | 26 17 59.8 | 16 54 35.6 | 8-9 | 5.4   | 3.69 | 1.16 | 12.10 | 18.15  | 36.08  | 47.86  | 2.98 | 2.64 | N/A          | N/A  | N/A |
| HB | HB4 | HB4  | HB4C-01         | 26 17 59.8 | 16 54 35.6 | 6-7 | 6.71  | 4.55 | 1.52 | 24.30 | 36.45  | 55.94  | 74.84  | 2.30 | 2.05 | N/A          | N/A  | N/A |
| HB | HB4 | HB4  | HB4C-02         | 26 17 59.8 | 16 54 35.6 | 5-6 | 8.02  | 3.58 | 1.9  | 28.56 | 42.85  | 57.58  | 79.72  | 2.02 | 1.86 | N/A          | N/A  | N/A |
| HB | HB4 | HB4  | HB4C-03         | 26 17 59.8 | 16 54 35.6 | 4-5 | 6.13  | 3.55 | 1.69 | 19.26 | 28.88  | 43.07  | 59.88  | 2.24 | 2.07 | N/A          | N/A  | N/A |
| HB | HB4 | HB4  | HB4C-04         | 26 17 59.8 | 16 54 35.6 | 6   | 5.52  | 3.2  | 1.23 | 11.38 | 17.06  | 33.02  | 44.59  | 2.90 | 2.61 | N/A          | N/A  | N/A |
| HB | HB4 | HB4  | HB4C-05         | 26 17 59.8 | 16 54 35.6 | 6-7 | 7.24  | 4.46 | 2.23 | 37.70 | 56.55  | 65.28  | 91.71  | 1.73 | 1.62 | N/A          | N/A  | N/A |
| HB | HB4 | HB4  | HB4C-06         | 26 17 59.8 | 16 54 35.6 | 4-5 | 6.2   | 3.04 | 1.13 | 11.15 | 16.73  | 34.62  | 46.01  | 3.10 | 2.75 | N/A          | N/A  | N/A |
| HB | HB4 | HB4  | HB4C-07         | 26 17 59.8 | 16 54 35.6 | 8-9 | 5.25  | 1.81 | 2.1  | 10.45 | 15.67  | 26.63  | 38.22  | 2.55 | 2.44 | N/A          | N/A  | N/A |
| HB | HB4 | HB4  | HB4C-08         | 26 17 59.8 | 16 54 35.6 | 6-7 | 8.88  | 4.46 | 1.72 | 35.67 | 53.50  | 73.42  | 98.25  | 2.06 | 1.84 | N/A          | N/A  | N/A |
| HB | HB4 | HB4  | HB4C-09         | 26 17 59.8 | 16 54 35.6 | 8-9 | 7.64  | 4.14 | 1.42 | 23.52 | 35.28  | 57.44  | 75.96  | 2.44 | 2.15 | N/A          | N/A  | N/A |
| HB | HB4 | HB4  | HB4C-10         | 26 17 59.8 | 16 54 35.6 | 4-5 | 9.94  | 5.89 | 1.26 | 38.63 | 57.94  | 99.44  | 123.30 | 2.57 | 2.13 | N/A          | N/A  | N/A |
| HB | HB4 | HB4  | HB4C-11         | 26 17 59.8 | 16 54 35.6 | 5-6 | 5.88  | 1.7  | 1.15 | 6.02  | 9.03   | 21.27  | 29.39  | 3.53 | 3.26 | N/A          | N/A  | N/A |
| HB | HB4 | HB4  | HB4C-12         | 26 17 59.8 | 16 54 35.6 | 5-6 | 5.01  | 2.93 | 1.55 | 11.91 | 17.87  | 30.08  | 42.39  | 2.52 | 2.37 | N/A          | N/A  | N/A |
| HB | HB4 | HB4  | HB4C-13         | 26 17 59.8 | 16 54 35.6 | 4-5 | 5.63  | 1.76 | 2.13 | 11.05 | 16.58  | 28.25  | 40.29  | 2.56 | 2.43 | N/A          | N/A  | N/A |
| HB | HB4 | HB4  | HB4C-14         | 26 17 59.8 | 16 54 35.6 | 5-6 | 5.31  | 2.16 | 0.8  | 4.80  | 7.21   | 20.87  | 27.40  | 4.34 | 3.80 | N/A          | N/A  | N/A |
| HB | HB4 | HB4  | HB4C-15         | 26 17 59.8 | 16 54 35.6 | 4-5 | 4.9   | 2    | 0.95 | 4.87  | 7.31   | 18.92  | 25.69  | 3.88 | 3.51 | N/A          | N/A  | N/A |
| HB | HB4 | HB4  | HB4C-16         | 26 17 59.8 | 16 54 35.6 | 5-6 | 4.93  | 3.29 | 1.1  | 9.34  | 14.01  | 29.69  | 39.68  | 3.18 | 2.83 | N/A          | N/A  | N/A |
| HB | HB4 | HB4  | HB4C-17         | 26 16 54.6 | 16 52 48.4 | 3-4 | 5.37  | 2.09 | 1.95 | 11.46 | 17.19  | 28.15  | 40.48  | 2.46 | 2.36 | N/A          | N/A  | N/A |
| HB | HB3 | HB3  | HB3-01          | 26 16 54.6 | 16 52 48.4 | 2-3 | 3.16  | 2.66 | 1.43 | 6.29  | 9.44   | 18.19  | 26.28  | 2.89 | 2.78 | N/A          | N/A  | N/A |
| HB | HB3 | HB3  | HB3-02          | 26 16 54.6 | 16 52 48.4 | 2-3 | 2.82  | 2.57 | 2.21 | 8.39  | 12.58  | 20.13  | 30.10  | 2.40 | 2.39 | 0.13         | 0.19 | 6   |



|    |      |      |         |            |            |     |      |      |      |       |       |       |       |      |      |      |      |     |
|----|------|------|---------|------------|------------|-----|------|------|------|-------|-------|-------|-------|------|------|------|------|-----|
| HB | HB3  | HB3  | HB3-03  | 26 16 54.6 | 16 52 48.4 | 3-4 | 1.85 | 1.84 | 1.57 | 2.80  | 4.20  | 9.65  | 14.45 | 3.45 | 3.44 | 0.14 | 0.18 | 6   |
| HB | HB3  | HB3  | HB3-04  | 26 16 54.6 | 16 52 48.4 | 3-4 | 2.93 | 2.2  | 1.43 | 4.83  | 7.24  | 14.81 | 21.65 | 3.07 | 2.99 | N/A  | N/A  | N/A |
| HB | HB3  | HB3  | HB3-05  | 26 16 54.6 | 16 52 48.4 | 5-6 | 2.74 | 2.65 | 0.85 | 3.23  | 4.85  | 13.63 | 18.60 | 4.22 | 3.84 | 0.09 | 0.12 | 9   |
| HB | HB3  | HB3  | HB3-06  | 26 16 54.6 | 16 52 48.4 | 3-4 | 4.31 | 2.55 | 0.97 | 5.58  | 8.37  | 20.52 | 27.72 | 3.68 | 3.31 | N/A  | N/A  | N/A |
| HB | HB3  | HB3  | HB3-07  | 26 16 54.6 | 16 52 48.4 | 3-4 | 3.13 | 2.03 | 0.76 | 2.53  | 3.79  | 11.90 | 16.14 | 4.71 | 4.26 | 0.14 | 0.18 | 6   |
| HB | HB3  | HB3  | HB3-08  | 26 16 54.6 | 16 52 48.4 | 2-3 | 4.05 | 3.5  | 1.32 | 9.80  | 14.70 | 27.36 | 37.92 | 2.79 | 2.58 | 0.15 | 0.2  | 14  |
| HB | HB3  | HB3  | HB3-09  | 26 16 54.6 | 16 52 48.4 | 2-3 | 2.99 | 2.1  | 0.5  | 1.64  | 2.47  | 10.88 | 13.86 | 6.62 | 5.62 | N/A  | N/A  | N/A |
| HB | HB3  | HB3  | HB3-10  | 26 16 54.6 | 16 52 48.4 | 2-3 | 2.8  | 1.83 | 0.78 | 2.09  | 3.14  | 9.93  | 13.72 | 4.75 | 4.37 | 0.09 | 0.13 | 16  |
| HB | HB3  | HB3  | HB3-11  | 26 16 54.6 | 16 52 48.4 | 1-2 | 2.01 | 1.55 | 1.22 | 1.99  | 2.99  | 7.91  | 11.72 | 3.97 | 3.92 | N/A  | N/A  | N/A |
| HB | HB3  | HB3  | HB3-12  | 26 16 54.6 | 16 52 48.4 | 1   | 1.5  | 0.94 | 0.85 | 0.63  | 0.94  | 3.71  | 5.47  | 5.90 | 5.81 | N/A  | N/A  | N/A |
| HB | HB3  | HB3  | HB3-13  | 26 16 54.6 | 16 52 48.4 | 3-4 | 1.26 | 1.04 | 0.69 | 0.47  | 0.71  | 3.09  | 4.55  | 6.54 | 6.41 | N/A  | N/A  | N/A |
| HB | HB3  | HB3  | HB3-14  | 26 16 54.6 | 16 52 48.4 | 4-5 | 3.34 | 3.01 | 0.83 | 4.37  | 6.55  | 18.14 | 24.07 | 4.15 | 3.67 | 0.1  | 0.18 | 8   |
| HB | HB3  | HB3  | HB3-15  | 26 16 54.6 | 16 52 48.4 | 5-6 | 3.99 | 3.15 | 1.09 | 7.17  | 10.76 | 23.51 | 31.97 | 3.28 | 2.97 | 0.16 | 0.17 | 3   |
| HB | HB3  | HB3  | HB3-16  | 26 16 54.6 | 16 52 48.4 | 5-6 | 4.19 | 2.98 | 1.49 | 9.74  | 14.61 | 25.66 | 36.39 | 2.63 | 2.49 | 0.08 | 0.12 | 13  |
| HB | HB3  | HB3  | HB3-17  | 26 16 54.6 | 16 52 48.4 | 7-8 | 4.82 | 3.56 | 1.11 | 9.97  | 14.96 | 31.20 | 41.56 | 3.13 | 2.78 | 0.12 | 0.17 | 13  |
| HB | HB3  | HB3  | HB3-18  | 26 18 49.0 | 16 53 40.2 | 3-4 | 5.52 | 4.59 | 2.94 | 39.00 | 58.50 | 58.95 | 86.49 | 1.51 | 1.48 | 0.13 | 0.21 | 10  |
| HB | HBGS | HBGS | HBGS-01 | 26 18 49.0 | 16 53 40.2 | 3-4 | 3.98 | 2.91 | 1.93 | 11.70 | 17.56 | 26.74 | 39.08 | 2.28 | 2.23 | 0.12 | 0.18 | 9   |
| HB | HBGS | HBGS | HBGS-02 | 26 18 49.0 | 16 53 40.2 | 3-4 | 3.76 | 2.78 | 1.73 | 9.47  | 14.20 | 23.50 | 34.19 | 2.48 | 2.41 | 0.13 | 0.19 | 9   |
| HB | HBGS | HBGS | HBGS-03 | 26 18 49.0 | 16 53 40.2 | 3-4 | 3.01 | 2.57 | 2.93 | 11.87 | 17.80 | 25.26 | 37.83 | 2.13 | 2.13 | 0.15 | 0.19 | 7   |
| HB | HBGS | HBGS | HBGS-04 | 26 18 49.0 | 16 53 40.2 | 2-3 | 4.21 | 2.41 | 2.46 | 13.07 | 19.60 | 28.13 | 41.52 | 2.15 | 2.12 | 0.16 | 0.19 | 10  |
| HB | HBGS | HBGS | HBGS-05 | 26 18 49.0 | 16 53 40.2 | 2-3 | 2.76 | 1.9  | 2.35 | 6.45  | 9.68  | 17.08 | 25.44 | 2.65 | 2.63 | 0.14 | 0.18 | 7   |
| HB | HBGS | HBGS | HBGS-06 | 26 18 49.0 | 16 53 40.2 | 3-4 | 3.46 | 1.63 | 1.5  | 4.43  | 6.64  | 14.34 | 20.85 | 3.24 | 3.14 | 0.16 | 0.21 | 15  |
| HB | HBGS | HBGS | HBGS-07 | 26 18 49.0 | 16 53 40.2 | 2-3 | 4.11 | 2.96 | 3.05 | 19.43 | 29.14 | 35.53 | 52.98 | 1.83 | 1.82 | N/A  | N/A  | N/A |
| HB | HBGS | HBGS | HBGS-08 | 26 18 49.0 | 16 53 40.2 | 2-3 | 2.8  | 2.64 | 5.93 | 22.95 | 34.43 | 42.78 | 62.28 | 1.86 | 1.81 | N/A  | N/A  | N/A |
| HB | HBGS | HBGS | HBGS-09 | 26 18 49.0 | 16 53 40.2 | 3-4 | 2.72 | 2.56 | 2.11 | 7.69  | 11.54 | 19.03 | 28.44 | 2.47 | 2.46 | 0.12 | 0.17 | 7   |
| HB | HBGS | HBGS | HBGS-10 | 26 18 49.0 | 16 53 40.2 | 3-4 | 3.56 | 2.68 | 2.33 | 11.64 | 17.46 | 25.43 | 37.82 | 2.19 | 2.17 | N/A  | N/A  | N/A |
| HB | HBGS | HBGS | HBGS-11 | 26 18 49.0 | 16 53 40.2 | 2-3 | 3.02 | 2.13 | 5.01 | 16.87 | 25.31 | 34.86 | 50.63 | 2.07 | 2.00 | 0.12 | 0.19 | 7   |
| HB | HBGS | HBGS | HBGS-12 | 26 18 49.0 | 16 53 40.2 | 4-5 | 3.36 | 1.97 | 2.17 | 7.52  | 11.28 | 19.31 | 28.57 | 2.57 | 2.53 | N/A  | N/A  | N/A |
| HB | HBGS | HBGS | HBGS-13 | 26 18 49.0 | 16 53 40.2 | 2-3 | 4.81 | 4.26 | 4.56 | 48.92 | 73.39 | 64.82 | 97.15 | 1.32 | 1.32 | N/A  | N/A  | N/A |
| HB | HBGS | HBGS | HBGS-14 | 26 18 49.0 | 16 53 40.2 | 2-3 | 2.63 | 2.04 | 2.73 | 7.67  | 11.50 | 19.07 | 28.45 | 2.49 | 2.47 | 0.14 | 0.2  | 8   |
| HB | HBGS | HBGS | HBGS-15 | 26 18 49.0 | 16 53 40.2 | 3-4 | 2.73 | 1.85 | 2.09 | 5.53  | 8.29  | 15.43 | 22.97 | 2.79 | 2.77 | 0.12 | 0.17 | 12  |
| HB | HBGS | HBGS | HBGS-16 | 26 18 49.0 | 16 53 40.2 | 3-4 | 3.05 | 2.84 | 1.39 | 6.30  | 9.46  | 18.39 | 26.47 | 2.92 | 2.80 | 0.13 | 0.16 | 9   |
| HB | HBGS | HBGS | HBGS-17 | 26 18 49.0 | 16 53 40.2 | 3-4 | 2.86 | 2.41 | 1.78 | 6.42  | 9.64  | 17.24 | 25.56 | 2.68 | 2.65 | 0.16 | 0.22 | 9   |
| HB | HBGS | HBGS | HBGS-18 | 26 18 49.0 | 16 53 40.2 | 2-3 | 3.32 | 2.5  | 1.93 | 8.39  | 12.58 | 20.75 | 30.68 | 2.47 | 2.44 | 0.13 | 0.2  | 8   |
| HB | HBGS | HBGS | HBGS-19 | 26 18 49.0 | 16 53 40.2 | 3-4 | 2.39 | 1.84 | 2.04 | 4.70  | 7.05  | 13.69 | 20.46 | 2.91 | 2.90 | 0.12 | 0.18 | 6   |
| HB | HBGS | HBGS | HBGS-20 | 26 18 49.0 | 16 53 40.2 | 3-4 | 3.5  | 2.16 | 2.47 | 9.78  | 14.67 | 22.81 | 33.84 | 2.33 | 2.31 | 0.16 | 0.21 | 12  |

|    |      |      |                 |            |            |     |      |      |      |       |       |       |       |      |      |      |      |     |
|----|------|------|-----------------|------------|------------|-----|------|------|------|-------|-------|-------|-------|------|------|------|------|-----|
| HB | HBGS | HBGS | HBGS-21         | 26 18 49.0 | 16 53 40.2 | 3-4 | 3.85 | 2.42 | 2.55 | 12.44 | 18.66 | 26.80 | 39.75 | 2.15 | 2.13 | 0.17 | 0.22 | 18  |
| HB | HBGS | HBGS | HBGS-22         | 26 18 49.0 | 16 53 40.2 | 1-2 | 3.34 | 2.81 | 2.73 | 13.42 | 20.12 | 27.47 | 41.12 | 2.05 | 2.04 | 0.15 | 0.19 | 6   |
| HB | HBGS | HBGS | HBGS-23         | 26 18 49.0 | 16 53 40.2 | 2-3 | 2.22 | 1.98 | 0.8  | 1.84  | 2.76  | 8.69  | 12.18 | 4.72 | 4.41 | 0.13 | 0.19 | 8   |
| HB | HBGS | HBGS | HBGS-24         | 26 18 49.0 | 16 53 40.2 | 2-3 | 2.22 | 1.99 | 0.91 | 2.10  | 3.16  | 9.10  | 12.96 | 4.32 | 4.10 | 0.16 | 0.19 | 8   |
| HB | HBGS | HBGS | HBGS-25         | 26 18 49.0 | 16 53 40.2 | 1-2 | 2.95 | 1.48 | 1.25 | 2.86  | 4.29  | 10.70 | 15.56 | 3.74 | 3.63 | 0.13 | 0.2  | 7   |
| HB | HBGS | HBGS | HBGS-26         | 26 18 49.0 | 16 53 40.2 | 3-4 | 2.45 | 1.5  | 1.85 | 3.56  | 5.34  | 11.63 | 17.25 | 3.27 | 3.23 | 0.14 | 0.2  | 8   |
| HB | HBGS | HBGS | HBGS-27         | 26 18 49.0 | 16 53 40.2 | 3-4 | 2.98 | 2.5  | 1.24 | 4.84  | 7.26  | 15.62 | 22.38 | 3.23 | 3.08 | 0.12 | 0.14 | 10  |
| HB | HBGS | HBGS | HBGS-28         | 26 18 49.0 | 16 53 40.2 | 1-2 | 4.21 | 3.2  | 2.66 | 18.76 | 28.15 | 35.10 | 52.12 | 1.87 | 1.85 | 0.11 | 0.15 | 12  |
| HB | HBGS | HBGS | HBGS-29         | 26 18 49.0 | 16 53 40.2 | 2-3 | 1.94 | 1.6  | 1.54 | 2.50  | 3.75  | 8.99  | 13.44 | 3.59 | 3.58 | N/A  | N/A  | N/A |
| HB | HBGS | HBGS | HBGS-30         | 26 18 49.0 | 16 53 40.2 | 2-3 | 3.36 | 2.24 | 1.2  | 4.73  | 7.09  | 15.72 | 22.38 | 3.32 | 3.15 | 0.14 | 0.19 | 18  |
| HB | HBGS | HBGS | HBGS-31         | 26 18 49.0 | 16 53 40.2 | 2-3 | 3.14 | 2.31 | 0.71 | 2.70  | 4.04  | 13.15 | 17.47 | 4.88 | 4.32 | N/A  | N/A  | N/A |
| HB | HBGS | HBGS | HBGS-32         | 26 18 49.0 | 16 53 40.2 | 3-4 | 2.64 | 1.74 | 1.48 | 3.56  | 5.34  | 11.78 | 17.40 | 3.31 | 3.26 | N/A  | N/A  | N/A |
| HB | HBGS | HBGS | HBGS-33         | 26 18 49.0 | 16 53 40.2 | 2-3 | 3.37 | 2.37 | 2.05 | 8.57  | 12.86 | 20.93 | 31.03 | 2.44 | 2.41 | N/A  | N/A  | N/A |
| HB | HBGS | HBGS | HBGS-34         | 26 18 49.0 | 16 53 40.2 | 2-3 | 2.63 | 1.65 | 2.31 | 5.25  | 7.87  | 15.08 | 22.35 | 2.87 | 2.84 | 0.12 | 0.2  | 7   |
| HB | HBGS | HBGS | HBGS-35         | 26 18 49.0 | 16 53 40.2 | 1-2 | 2.55 | 1.43 | 1.58 | 3.02  | 4.53  | 10.57 | 15.61 | 3.50 | 3.45 | 0.14 | 0.18 | 10  |
| HB | HBGS | HBGS | HBGS-36         | 26 18 49.0 | 16 53 40.2 | 3-4 | 2.97 | 2.31 | 1.06 | 3.81  | 5.71  | 13.86 | 19.57 | 3.64 | 3.43 | 0.14 | 0.19 | 13  |
| HB | HBGS | HBGS | HBGS-37         | 26 18 49.0 | 16 53 40.2 | 2-3 | 2.88 | 1.99 | 0.82 | 2.46  | 3.69  | 11.06 | 15.28 | 4.50 | 4.14 | N/A  | N/A  | N/A |
| HB | HBGS | HBGS | HBGS-38         | 26 18 49.0 | 16 53 40.2 | 2-3 | 2.42 | 2.06 | 1.41 | 3.68  | 5.52  | 12.03 | 17.75 | 3.27 | 3.22 | 0.13 | 0.17 | 9   |
| HB | HBGS | HBGS | HBGS-39         | 26 18 49.0 | 16 53 40.2 | 3-4 | 2.36 | 1.64 | 2.02 | 4.09  | 6.14  | 12.60 | 18.77 | 3.08 | 3.06 | 0.13 | 0.19 | 13  |
| HB | HBGS | HBGS | HBGS-40         | 26 18 49.0 | 16 53 40.2 | 1-2 | 4.17 | 2.63 | 3.09 | 17.74 | 26.62 | 33.83 | 50.23 | 1.91 | 1.89 | 0.18 | 0.23 | 9   |
| HB | HBGS | HBGS | HBGS-41         | 26 18 49.0 | 16 53 40.2 | 2-3 | 2.39 | 1.94 | 1.73 | 4.20  | 6.30  | 12.76 | 19.05 | 3.04 | 3.02 | 0.13 | 0.17 | 10  |
| HB | HBGS | HBGS | HBGS-42         | 26 18 49.0 | 16 53 40.2 | 3-4 | 2.95 | 2.45 | 1.79 | 6.77  | 10.16 | 17.92 | 26.54 | 2.65 | 2.61 | 0.12 | 0.15 | 9   |
| HB | HBGS | HBGS | HBGS-43         | 26 18 49.0 | 16 53 40.2 | 2-3 | 2.62 | 2.01 | 1.2  | 3.31  | 4.96  | 11.71 | 17.00 | 3.54 | 3.43 | 0.15 | 0.2  | 9   |
| HB | HBGS | HBGS | Sample and Rock | 27 18 49.0 | 17 53 40.2 | 3-4 | 4.18 | 2.37 | 1.2  | 6.22  | 9.34  | 19.95 | 27.91 | 3.20 | 2.99 | N/A  | N/A  | N/A |
| HB | HBGS | HBGS | HBGS-44         | 28 18 49.0 | 18 53 40.2 | 3-4 | 3.19 | 2    | 2.36 | 7.88  | 11.83 | 19.71 | 29.26 | 2.50 | 2.47 | 0.17 | 0.21 | 10  |
| HB | HBGS | HBGS | HBGS-45         | 26 18 49.0 | 16 53 40.2 | 2-3 | 3.58 | 3.26 | 2.44 | 14.91 | 22.37 | 29.95 | 44.55 | 2.01 | 1.99 | 0.07 | 0.14 | 12  |
| HB | HBGS | HBGS | HBGS-46         | 26 18 49.0 | 16 53 40.2 | 3-4 | 3.71 | 2    | 1.49 | 5.79  | 8.68  | 17.27 | 25.02 | 2.98 | 2.88 | 0.18 | 0.22 | 5   |
| HB | HBGS | HBGS | HBGS-47         | 26 18 49.0 | 16 53 40.2 | 2-3 | 4.18 | 2.9  | 2.31 | 14.66 | 21.99 | 30.31 | 44.73 | 2.07 | 2.03 | 0.16 | 0.21 | 11  |
| HB | HBGS | HBGS | HBGS-48         | 26 18 49.0 | 16 53 40.2 | 2-3 | 3.52 | 2.6  | 2.16 | 10.35 | 15.53 | 23.69 | 35.14 | 2.29 | 2.26 | N/A  | N/A  | N/A |
| HB | HBGS | HBGS | HBGS-49         | 26 18 49.0 | 16 53 40.2 | 2-3 | 3.14 | 2.58 | 1.03 | 4.37  | 6.55  | 15.79 | 21.98 | 3.61 | 3.35 | 0.1  | 0.14 | 9   |
| HB | HBGS | HBGS | HBGS-50         | 26 18 49.0 | 16 53 40.2 | 2-3 | 3.63 | 2.49 | 1.3  | 6.15  | 9.23  | 18.77 | 26.70 | 3.05 | 2.89 | N/A  | N/A  | N/A |
| HB | HBGS | HBGS | HBGS-51         | 26 18 49.0 | 16 53 40.2 | 2-3 | 3.52 | 2.33 | 1.72 | 7.39  | 11.08 | 19.58 | 28.69 | 2.65 | 2.59 | N/A  | N/A  | N/A |
| HB | HBGS | HBGS | HBGS-52         | 26 18 49.0 | 16 53 40.2 | 1-2 | 3.58 | 2.08 | 1.91 | 7.45  | 11.17 | 19.48 | 28.68 | 2.62 | 2.57 | 0.15 | 0.18 | 11  |
| HB | HBGS | HBGS | HBGS-53         | 26 18 49.0 | 16 53 40.2 | 2-3 | 2.71 | 2.06 | 1.98 | 5.79  | 8.68  | 15.82 | 23.60 | 2.73 | 2.72 | 0.14 | 0.18 | 15  |
| HB | HBGS | HBGS | HBGS-54         | 26 18 49.0 | 16 53 40.2 | 2-3 | 2.52 | 1.89 | 2.08 | 5.19  | 7.78  | 14.65 | 21.89 | 2.82 | 2.81 | 0.14 | 0.2  | 9   |
| HB | HBGS | HBGS | HBGS-55         | 26 18 49.0 | 16 53 40.2 | 2-3 | 3.24 | 2.48 | 3.38 | 14.22 | 21.33 | 28.83 | 42.99 | 2.03 | 2.02 | 0.16 | 0.2  | 11  |

|    |      |      |         |            |            |     |      |      |      |       |       |       |       |      |      |      |      |     |
|----|------|------|---------|------------|------------|-----|------|------|------|-------|-------|-------|-------|------|------|------|------|-----|
| HB | HBGS | HBGS | HBGS-56 | 26 18 49.0 | 16 53 40.2 | 2-3 | 3.99 | 2.89 | 1.48 | 8.94  | 13.40 | 23.95 | 34.11 | 2.68 | 2.54 | 0.18 | 0.23 | 11  |
| HB | HBGS | HBGS | HBGS-57 | 26 18 49.0 | 16 53 40.2 | 2   | 3.15 | 2.35 | 1.99 | 7.71  | 11.57 | 19.41 | 28.82 | 2.52 | 2.49 | N/A  | N/A  | N/A |
| HB | HBGS | HBGS | HBGS-58 | 26 18 49.0 | 16 53 40.2 | 3-4 | 2.83 | 2.35 | 0.83 | 2.89  | 4.34  | 12.56 | 17.20 | 4.35 | 3.97 | N/A  | N/A  | N/A |
| HB | HBGS | HBGS | HBGS-59 | 26 18 49.0 | 16 53 40.2 | 2-3 | 4.04 | 3.2  | 1.34 | 9.07  | 13.61 | 25.44 | 35.55 | 2.80 | 2.61 | 0.13 | 0.19 | 9   |
| HB | HBGS | HBGS | HBGS-60 | 26 18 49.0 | 16 53 40.2 | 3-4 | 2.66 | 3.01 | 1.6  | 6.71  | 10.06 | 18.32 | 26.83 | 2.73 | 2.67 | N/A  | N/A  | N/A |
| HB | HBGS | HBGS | HBGS-61 | 26 18 49.0 | 16 53 40.2 | 2-3 | 3.53 | 3.28 | 1.46 | 8.85  | 13.28 | 23.76 | 33.81 | 2.68 | 2.55 | 0.9  | 0.11 | 8   |
| HB | HBGS | HBGS | HBGS-62 | 26 18 49.0 | 16 53 40.2 | 1-2 | 3.43 | 1.72 | 3.11 | 9.61  | 14.41 | 23.66 | 34.43 | 2.46 | 2.39 | 0.13 | 0.17 | 11  |
| HB | HBGS | HBGS | HBGS-63 | 26 18 49.0 | 16 53 40.2 | 3-4 | 2.7  | 2.33 | 1.44 | 4.74  | 7.11  | 14.51 | 21.26 | 3.06 | 2.99 | 0.1  | 0.17 | 11  |
| HB | HBGS | HBGS | HBGS-64 | 26 18 49.0 | 16 53 40.2 | 2-3 | 3.86 | 3.18 | 1.4  | 9.00  | 13.50 | 24.65 | 34.76 | 2.74 | 2.58 | 0.14 | 0.2  | 14  |
| HB | HBGS | HBGS | HBGS-65 | 26 18 49.0 | 16 53 40.2 | 2-3 | 3.64 | 3    | 1.2  | 6.86  | 10.29 | 21.31 | 29.67 | 3.11 | 2.88 | 0.13 | 0.18 | 15  |
| HB | HBGS | HBGS | HBGS-66 | 26 18 49.0 | 16 53 40.2 | 2-3 | 3.53 | 2.61 | 2.83 | 13.65 | 20.48 | 27.97 | 41.77 | 2.05 | 2.04 | 0.12 | 0.18 | 17  |
| HB | HBGS | HBGS | HBGS-67 | 26 18 49.0 | 16 53 40.2 | 1-2 | 3.46 | 2.3  | 1.79 | 7.46  | 11.19 | 19.51 | 28.70 | 2.62 | 2.56 | 0.12 | 0.17 | 11  |
| HB | HBGS | HBGS | HBGS-68 | 26 18 49.0 | 16 53 40.2 | 3-4 | 2.65 | 2.17 | 1.02 | 3.07  | 4.61  | 11.79 | 16.76 | 3.84 | 3.64 | N/A  | N/A  | N/A |
| HB | HBGS | HBGS | HBGS-69 | 26 18 49.0 | 16 53 40.2 | 3-4 | 4.12 | 2.59 | 2.05 | 11.45 | 17.18 | 26.14 | 38.37 | 2.28 | 2.23 | N/A  | N/A  | N/A |
| HB | HBGS | HBGS | HBGS-70 | 27 18 49.0 | 17 53 40.2 | 3-4 | 4.17 | 3.07 | 2.99 | 20.04 | 30.06 | 36.30 | 54.11 | 1.81 | 1.80 | 0.13 | 0.19 | 12  |

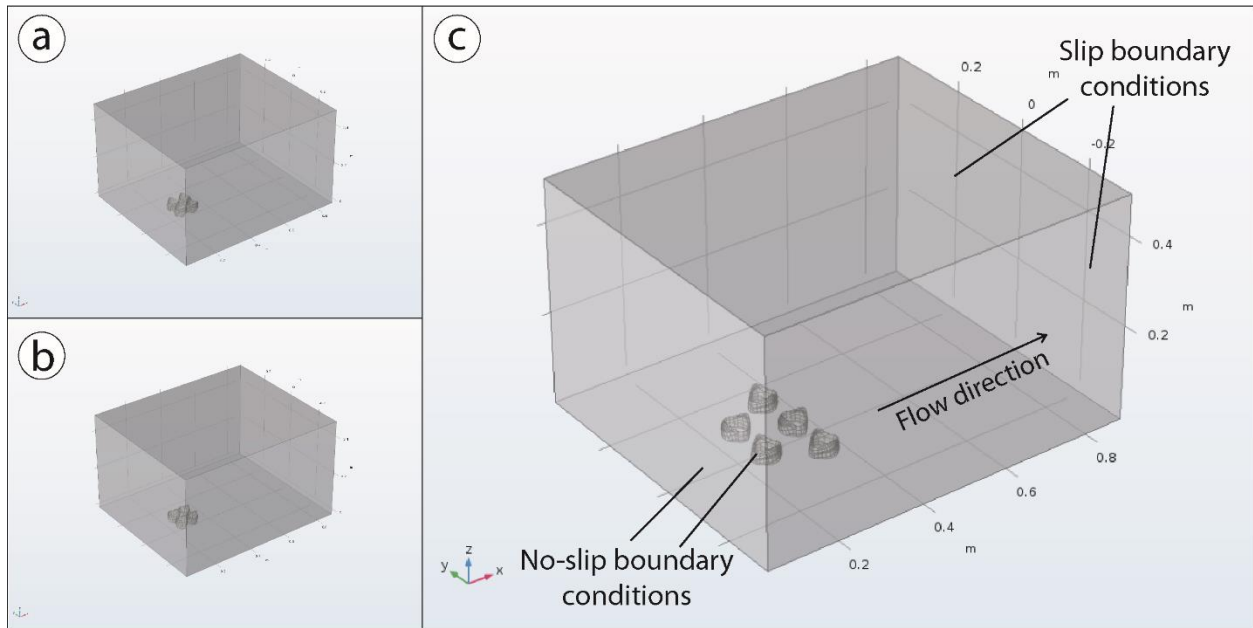

**Fig. S3. Select examples of CFD simulation setup. a) Parallel clumped. b) Perpendicular clumped. c) Mixed offset setup showing slip/no-slip conditions and flow direction.**

**Table S2. Sensitivity analyses for meshing.**

| Density of fluid (kg/m <sup>3</sup> ) |         | Dynamic viscosity of fluid (kg/(s·m)) |       |        |              |             |                              |                                  |           |                    |                |                 |                |                  |                                   |        |
|---------------------------------------|---------|---------------------------------------|-------|--------|--------------|-------------|------------------------------|----------------------------------|-----------|--------------------|----------------|-----------------|----------------|------------------|-----------------------------------|--------|
| 1000                                  |         | 0.001                                 |       | Model  | Burial depth | Orientation | Characteristic dimension (m) | Reference area (m <sup>2</sup> ) | Mesh size | Number of elements | Velocity (m/s) | Reynolds number | Drag force (N) | Drag coefficient | Difference from extra coarse mesh |        |
| Single individual                     | Shallow | Parallel                              | 0.059 | 0.0032 | Extra coarse | 116454      | 0.10                         | 5900                             | 0.0119716 | 466559836          | 0              | 0.7482279       | 15998975       |                  |                                   |        |
|                                       |         |                                       |       |        |              |             |                              |                                  | 0.0458390 | 448725999          | 0              | 0.7162350       | 76134373       |                  |                                   |        |
|                                       |         |                                       |       |        |              |             |                              |                                  | 0.2557721 | 173372060          | 0              | 0.6394302       | 93343015       |                  |                                   |        |
|                                       |         |                                       |       |        |              |             |                              |                                  | 0.50      | 29500              | 0              |                 |                |                  |                                   |        |
|                                       |         |                                       |       |        |              |             | Coarser                      | 212727                           | 0.10      | 5900               | 0.0117160      | 986923044       | 0              | 0.7322561        | 68269025                          | -2.13% |
|                                       |         |                                       |       |        |              |             |                              |                                  |           |                    | 0.0457004      | 305595039       | 0              | 0.7140692        | 27492248                          | -0.30% |
|                                       |         |                                       |       |        |              |             |                              |                                  |           |                    | 0.2666390      | 609021620       | 0              | 0.6665976        | 52255405                          | 4.25%  |
|                                       |         |                                       |       |        |              |             |                              |                                  |           |                    | 0.50           | 29500           | 0              |                  |                                   |        |
|                                       |         |                                       |       |        |              |             | Coarse                       | 400421                           | 0.10      | 5900               | 0.0113553      | 670038049       | 0              | 0.7097104        | 37737806                          | -3.08% |
|                                       |         |                                       |       |        |              |             |                              |                                  |           |                    | 0.0446876      | 874227407       | 0              | 0.6982451        | 15980323                          | -2.22% |
|                                       |         |                                       |       |        |              |             |                              |                                  |           |                    | 0.2671847      | 771292140       | 0              | 0.6679619        | 42823035                          | 0.20%  |
|                                       |         |                                       |       |        |              |             |                              |                                  |           |                    | 0.50           | 29500           | 0              |                  |                                   |        |
|                                       |         |                                       |       |        | Normal       | 783250      | 0.10                         | 5900                             | 0.0111549 | 871723099          | 0              | 0.6971866       | 98269369       | -1.76%           |                                   |        |
|                                       |         |                                       |       |        |              |             |                              |                                  | 0.0443515 | 604810512          | 0              | 0.6929931       | 32516425       | -0.75%           |                                   |        |
|                                       |         |                                       |       |        |              |             |                              |                                  | 0.2745139 | 143245500          | 0              | 0.6862847       | 85811375       | 2.74%            |                                   |        |
|                                       |         |                                       |       |        |              |             |                              |                                  | 0.50      | 29500              | 0              |                 |                |                  |                                   |        |

To establish the optimal mesh size to use in our CFD simulations, we repeated simulations for a single individual of *Ernietta* oriented parallel to the current with shallow burial using different mesh sizes. We compared the drag forces for these different mesh sizes to identify the coarsest mesh that would guarantee the computational accuracy of the simulation (i.e. the results were not substantially different from a finer mesh).

## Section S1. Reynolds number and drag coefficient calculations for characterizing flow regimes

Reynolds numbers ( $Re$ ) were calculated using the following equation

$$Re = \rho u L / \mu \quad (1)$$

$\rho$  is the density of water ( $1000 \text{ kg m}^{-3}$ ),  $u$  is the inlet velocity ( $0.1, 0.2, \text{ or } 0.5 \text{ m s}^{-1}$ ),  $L$  is the characteristic dimension (Height of model exposed to flow; S. Fig. 7.1), and  $\mu$  is the dynamic viscosity of water ( $0.001 \text{ kg m}^{-1} \text{ s}^{-1}$ ).

Drag forces were calculated to quantify the forces exerted by the fluid on *Ernietta*. The results were used to calculate the coefficients of drag by solving the following equation

$$C_d = 2F_d / \rho u^2 A \quad (2)$$

where  $C_d$  is the drag coefficient,  $F_d$  is the drag force (N),  $\rho$  is the fluid density ( $\text{kg/m}^3$ ),  $u$  is the inlet velocity (m/s), and  $A$  is the characteristic area ( $\text{m}^2$ ). Here, the characteristic area is the surface area of *Ernietta* exposed above the sediment water interface, which varied depending on the burial depth.

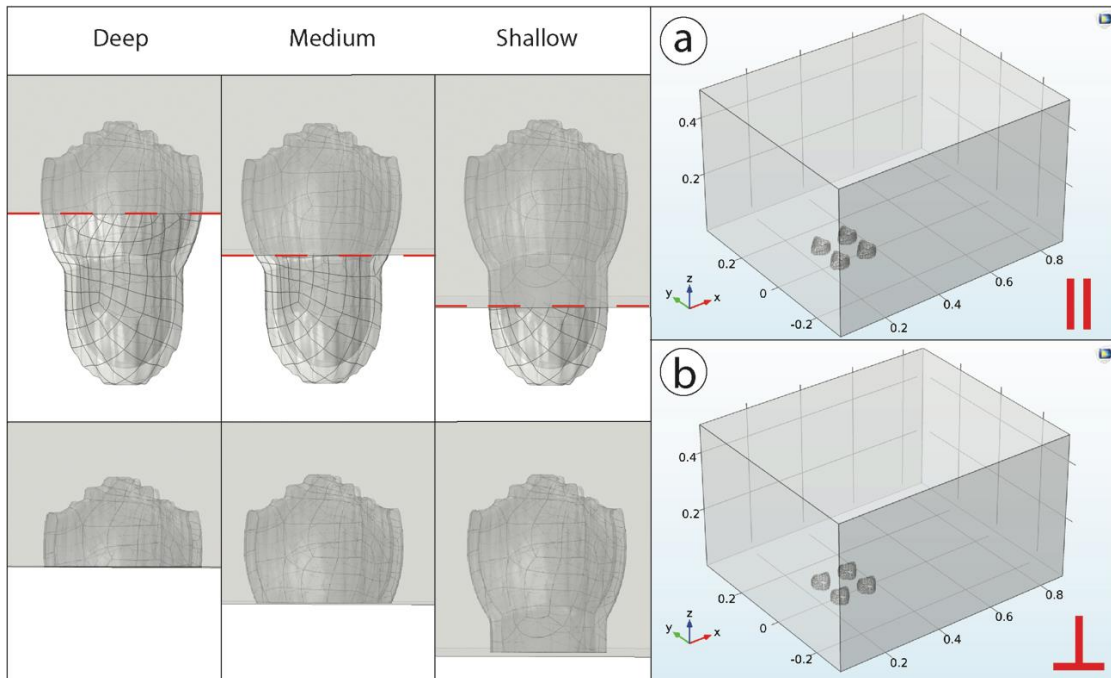

**Fig. S4. Frontal surface area at respective burial depth for calculations. a)** Parallel orientation with respect to flow. **b)** Perpendicular orientation with respect to flow. Characteristic length scale was frontal area with respect to flow.

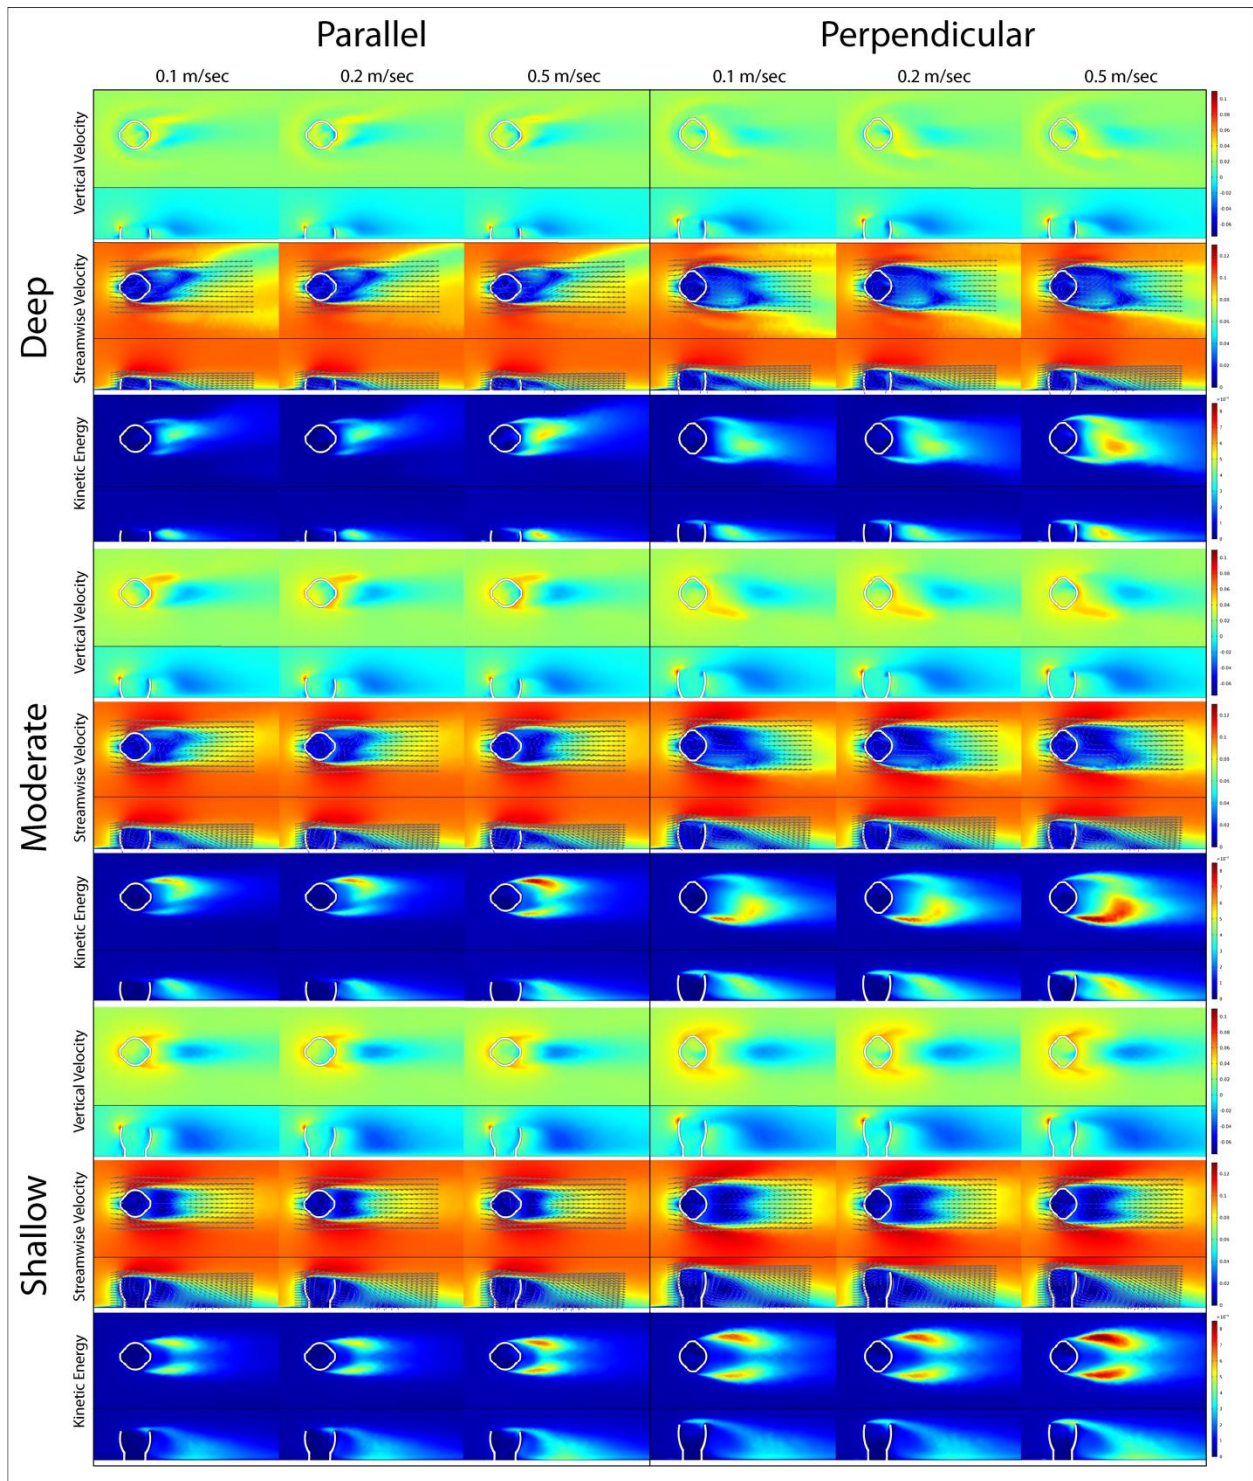

**Fig. S5. CFD results for single-individual model.** Results visualized as two-dimensional plots of vertical velocity magnitude, average flow velocity magnitude with flow vectors (gray arrows; length of arrows proportional to the natural logarithm of the flow velocity magnitude), and kinetic energy.

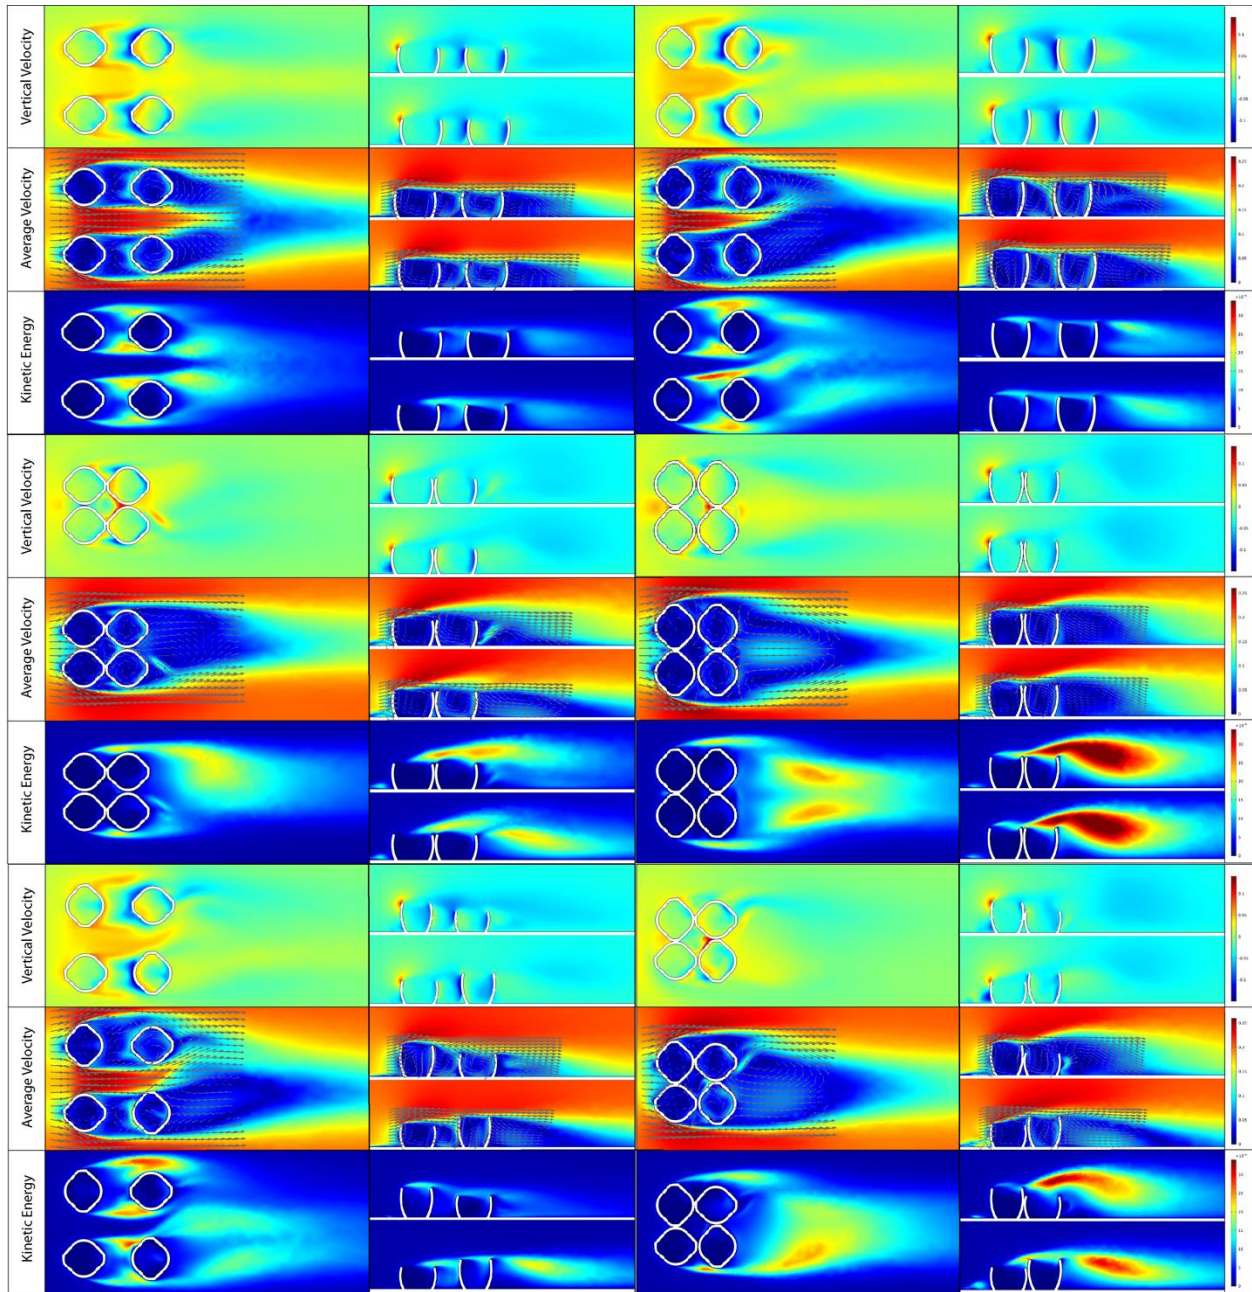

**Fig. S6. CFD results for multiple-individual model.** Results visualized as two-dimensional plots of vertical velocity magnitude, average flow velocity magnitude with flow vectors (gray arrows; length of arrows proportional to the natural logarithm of the flow velocity magnitude), and kinetic energy.



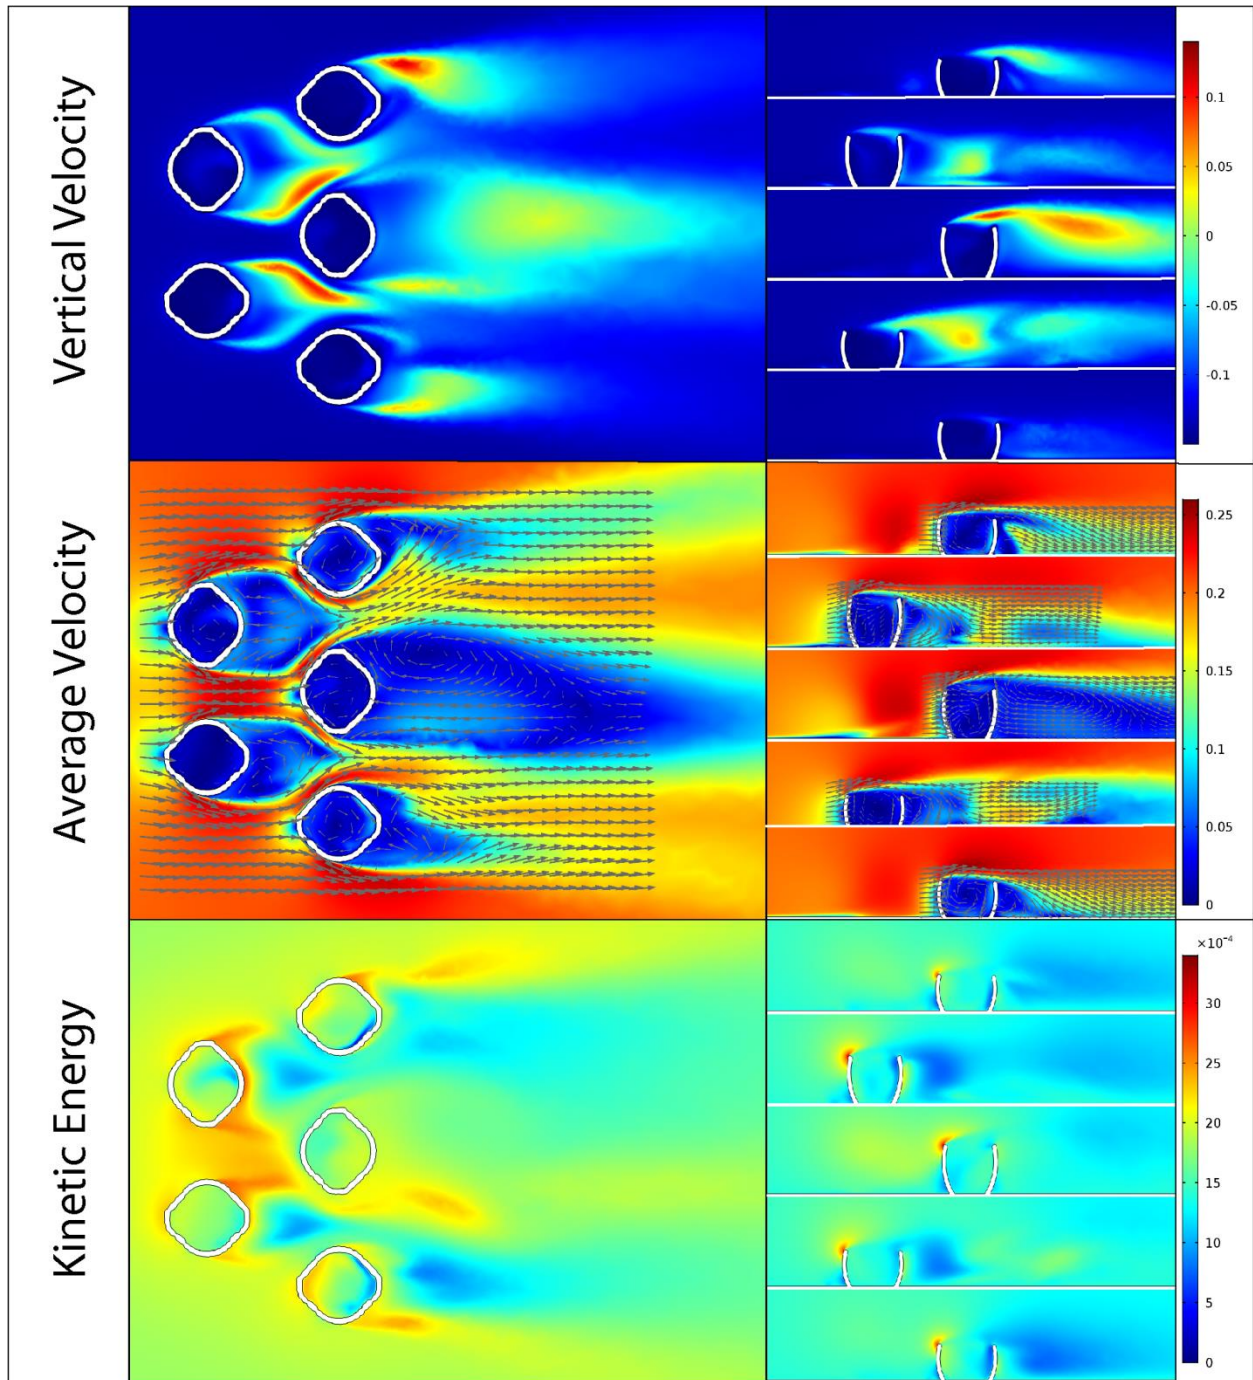

**Fig. S7. CFD results for offset multiple-individual model.** Results visualized as two-dimensional plots of vertical velocity magnitude, average flow velocity magnitude with flow vectors (gray arrows; length of arrows proportional to the natural logarithm of the flow velocity magnitude), and kinetic energy.

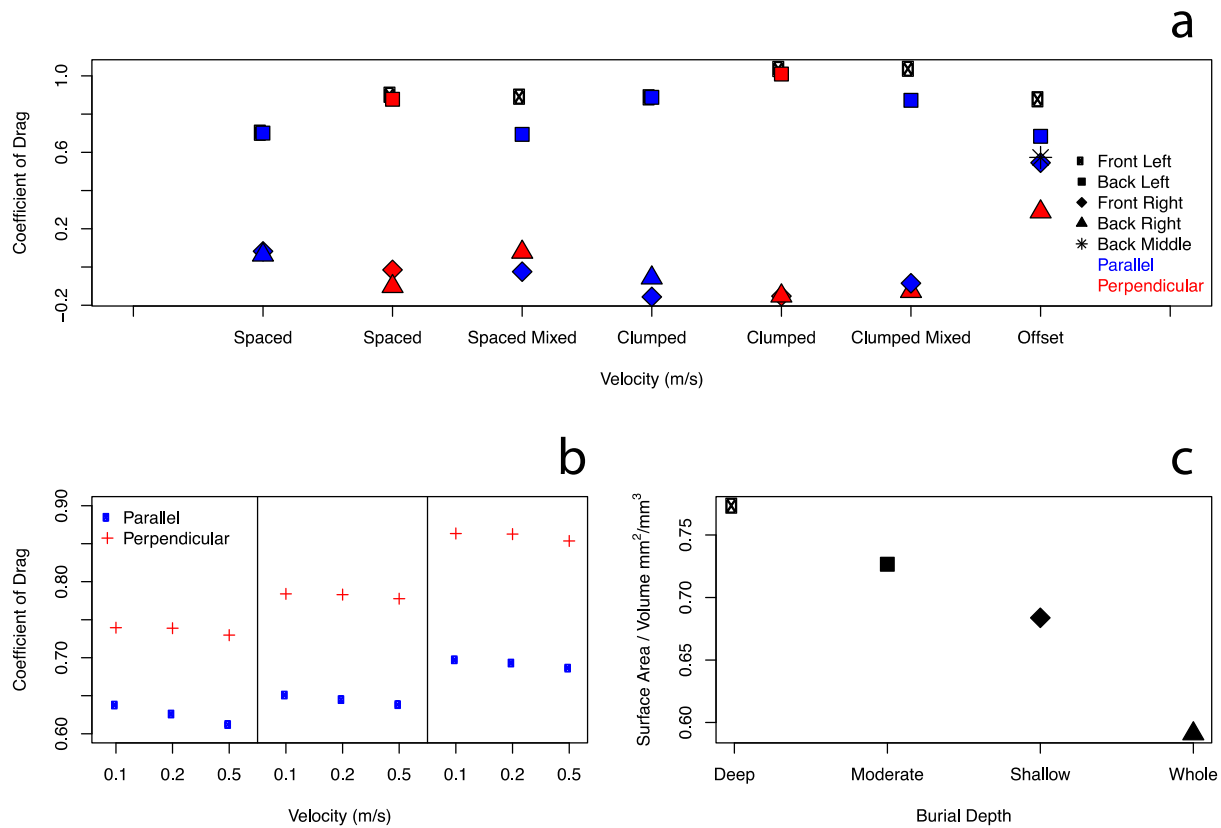

**Fig. S8. CFD drag results and SA/V values for all models.** a) Coefficients of drag for multiple model simulations. b) Coefficients of drag for single model simulations. c) SA/V ratios for individual models at four burial depths.

**Movie S1. 2D FSI simulation of *Ernietta* in perpendicular orientation.** Initial frames are showing the simulation building to steady state.

**Movie S2. 3D FSI simulation of *Ernietta* in parallel orientation.** Initial frames are showing the simulation building to steady state.
